# Supplementary material for: Regional occupancy increases for widespread species but decreases for narrowly distributed species in metacommunity time series
Source: PubMed Central journal article supplement (PMC10020147; doi:10.1038/s41467-023-37127-2), 2023-03-16
Supplement: 41467_2023_37127_MOESM1_ESM.pdf [file 41467_2023_37127_MOESM1_ESM.pdf]

## **Supplementary Information For**

### **Regional occupancy increases for widespread species but decreases for narrowly distributed species in metacommunity time series**

Wu-Bing Xu, Shane A. Blowes, Viviana Brambilla, Cher F. Y. Chow, Ada Fontrodona-Eslava, Inês S. Martins, Daniel McGlinn, Faye Moyes, Alban Sagouis, Hideyasu Shimadzu, Roel van Klink, Anne E. Magurran, Nicholas J. Gotelli, Brian J. McGill, Maria Dornelas, Jonathan M. Chase

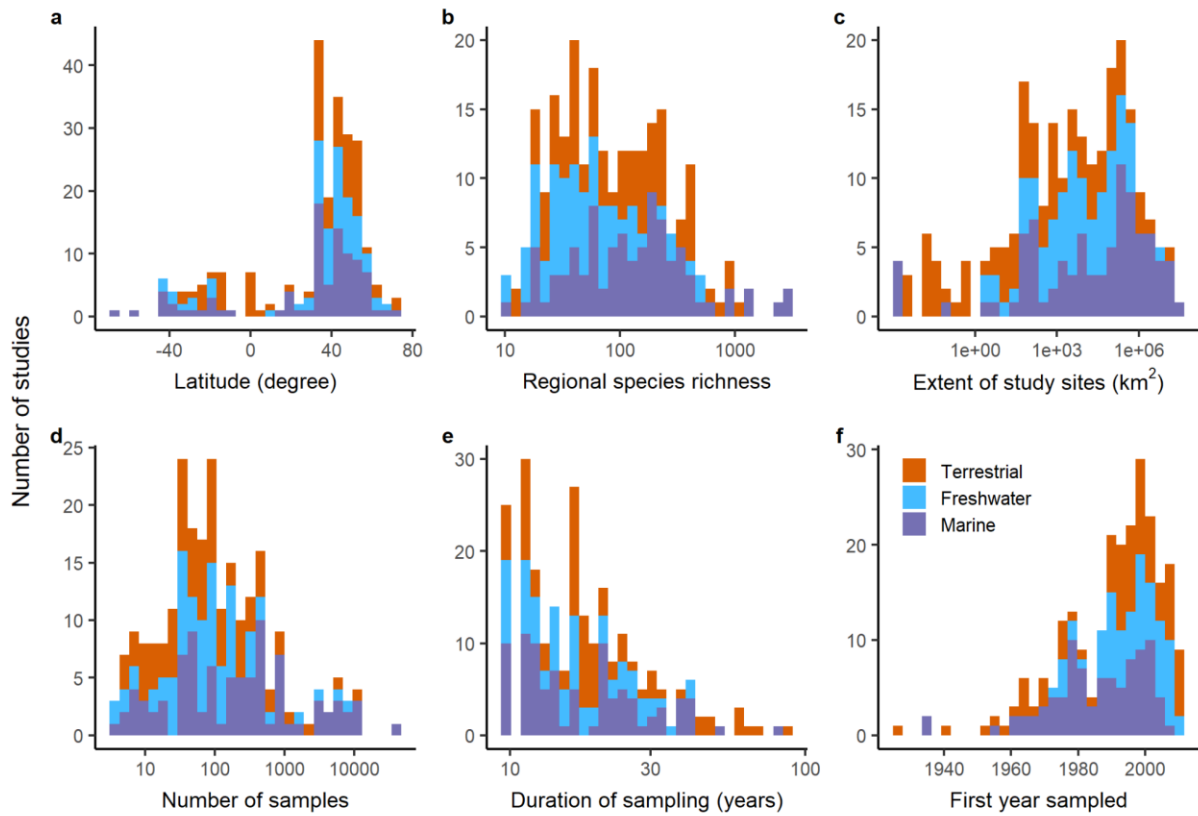

**Supplementary Fig. 1 | Frequency distribution of study characteristics.** a-f, The characteristics include central latitude of study sites (a), regional species richness observed in the study (b), extent of study sites (c), number of samples used to calculate occupancy in each period (d), duration of sampling (e), and start year of sampling (f). The colors indicate the terrestrial (orange), freshwater (blue) and marine (purple) realms where studies came from. The medians of these variables are 41.2° (based on absolute latitude), 76 species, 4,274 km<sup>2</sup>, 84 samples, 16 years, and 1994, respectively.

**a** Area of occupancy (AOO): number of grid-cells

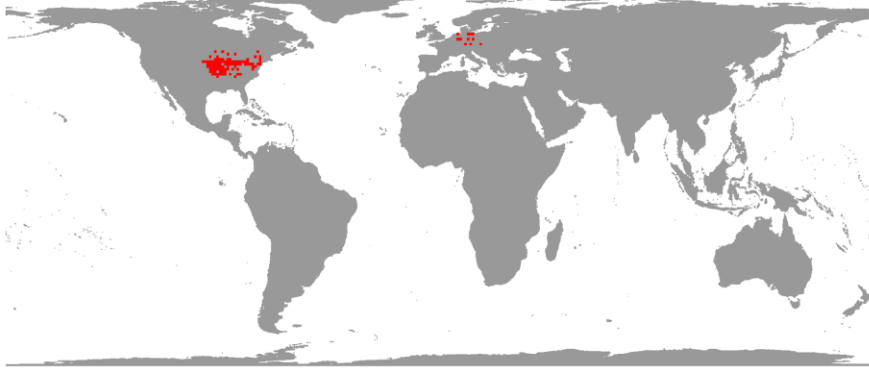

**b** Extent of occurrences (EOO): area of alpha hulls

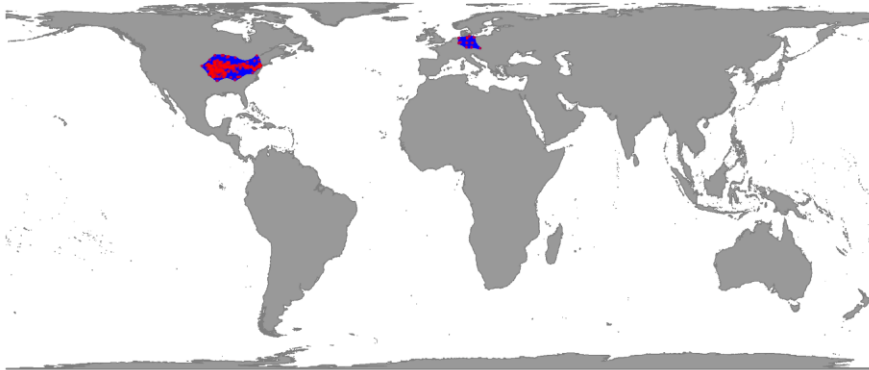

**Supplementary Fig. 2 | A diagram showing how a species' geographic range size was measured.** We first downloaded and cleaned species distribution occurrences from the Global Biodiversity Information Facility. A species' range size was then measured as the area of occupancy (AOO) which was estimated as the number of grid cells (red cells) occupied by the species (**a**), and the extent of occurrences (EOO) which was estimated as the area of the alpha hulls (blue polygons) containing the species' distribution occurrences (**b**). Red points in **b** were the species' distribution occurrences. We estimated AOO using three grid-cell resolutions: 10 km × 10 km, 50 km × 50 km, and 100 km × 100 km. The alpha hull was constructed using the alpha parameter set to six.

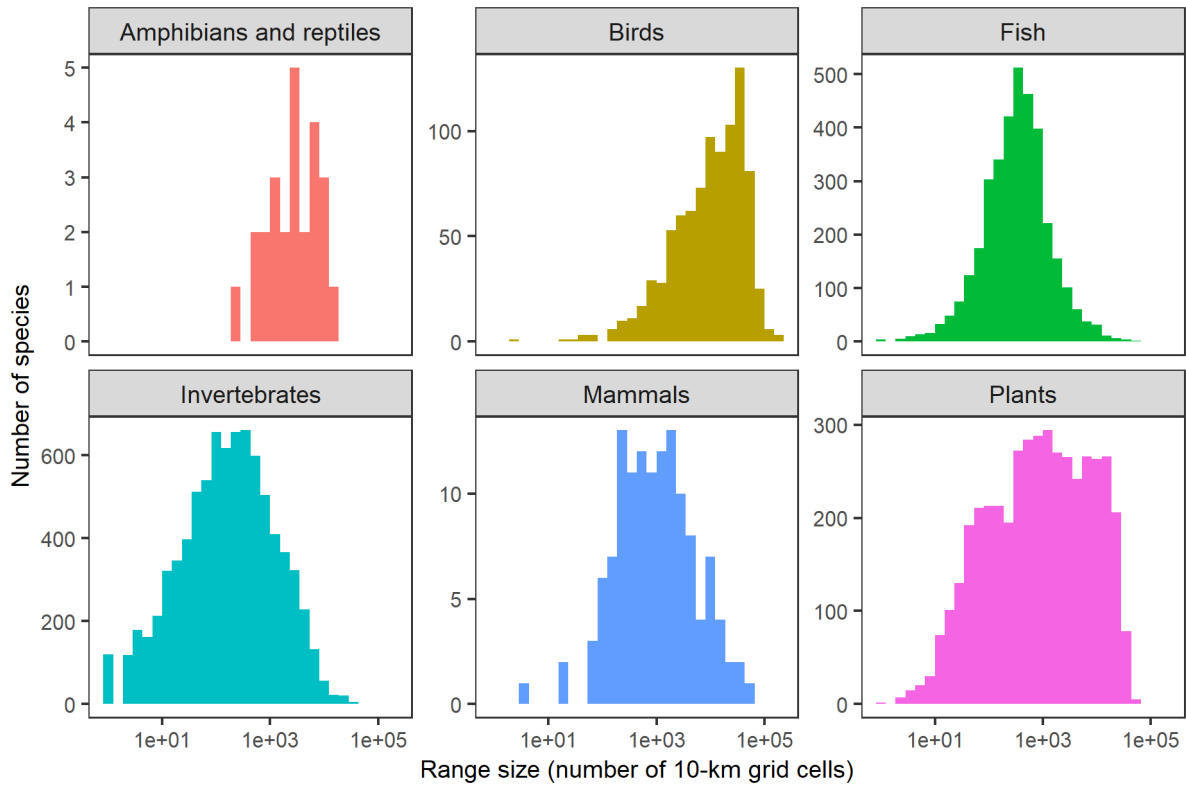

**Supplementary Fig. 3 | Range size frequency distribution for each taxonomic group.**

Range sizes were measured as the number of 10-km grid cells where distribution occurrences were observed.

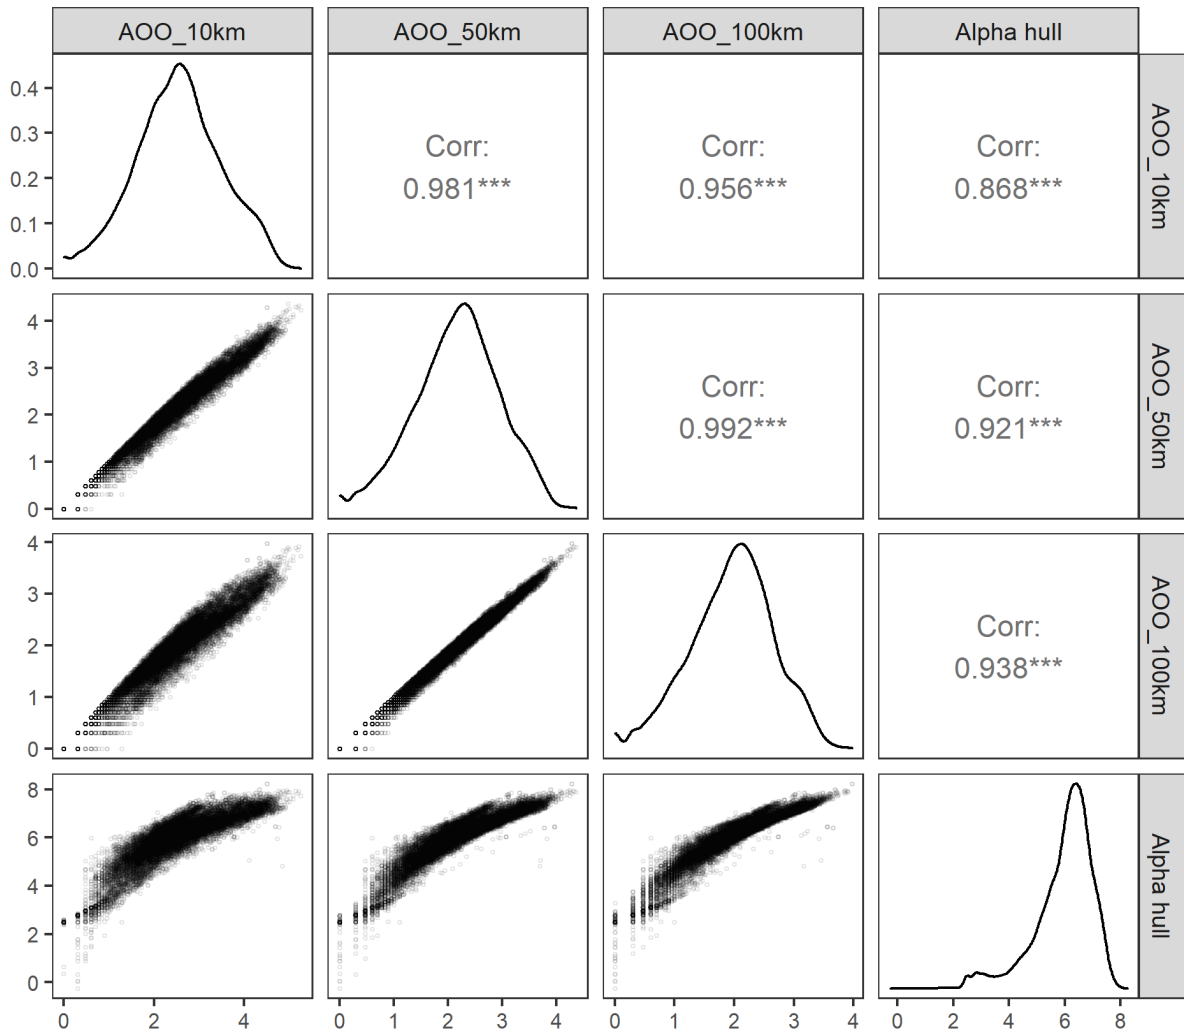

**Supplementary Fig. 4 | Pearson correlation between different estimates of species' range size.** Range sizes were measured as the area of occupancy (AOO) defined as the number of grid cells where distribution occurrences were observed using three resolutions (10-, 50-, 100-km), and the extent of occurrences (EOO) defined as the area of alpha hulls. There are strong positive correlations among these  $\log_{10}$ -transformed estimates (Pearson'  $r > 0.868$ ).

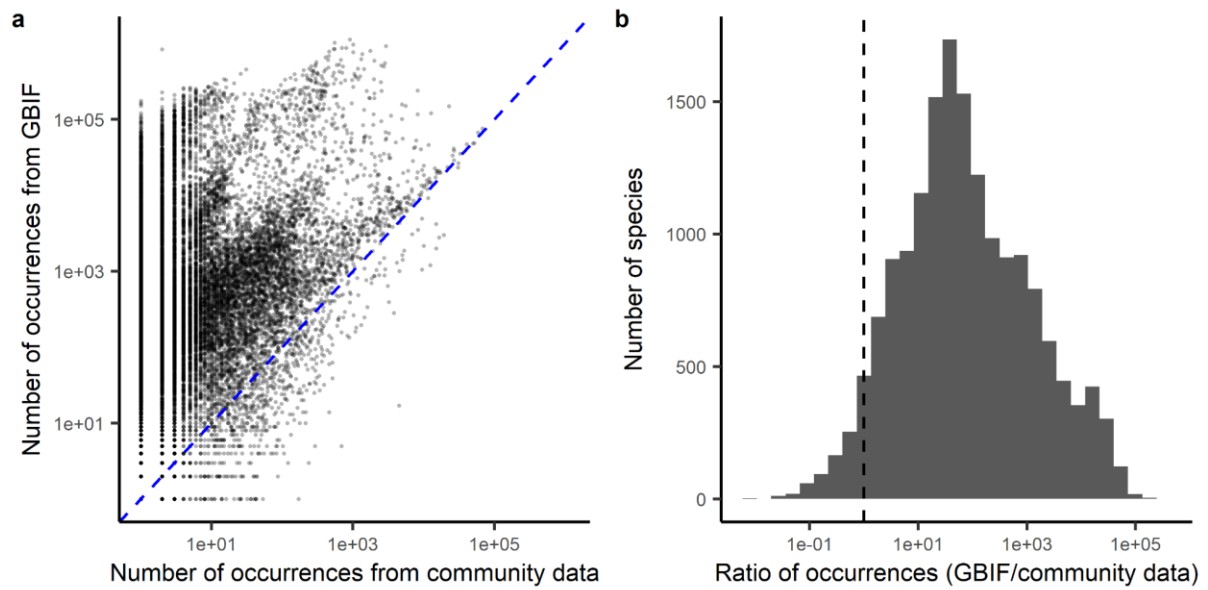

**Supplementary Fig. 5 | Comparison of the number of occurrences from GBIF and assemblage datasets (a) and frequency distribution of the ratio between them (b).** The number of occurrences was measured as the number of occupied grid-cells in  $0.01^\circ$ . The blue dashed line in panel **a** is the identity line. The vertical dashed line in panel **b** shows the same number of occurrences from GBIF and the assemblage dataset (*ratio* = 1).

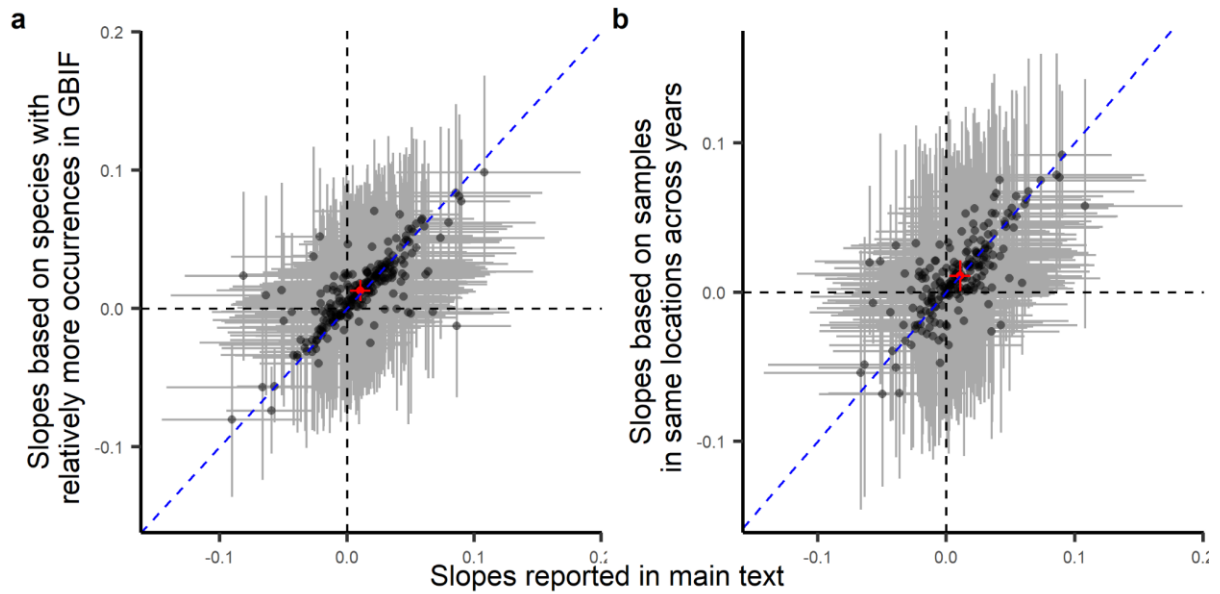

**Supplementary Fig. 6 | Sensitivity analyses for using different data subsets.** Comparison of the slopes reported in the main text (x-axis) with those obtained from analyses using data subsetted in different ways (y-axis). **a** Slopes in the y-axis were from an analysis including only the species that had at least five times more occurrences in GBIF than in the assemblage dataset (24,520 observations across 237 studies); **b** slopes in the y-axis were from an analysis using assemblage data with sites in the same locations across years (18,331 observations across 206 studies). Black points and gray lines indicate the study-level slope estimates and their 95% credible intervals; the red point and line indicate the overall slope estimate and its 95% credible interval. The blue dashed line indicates the identity line.

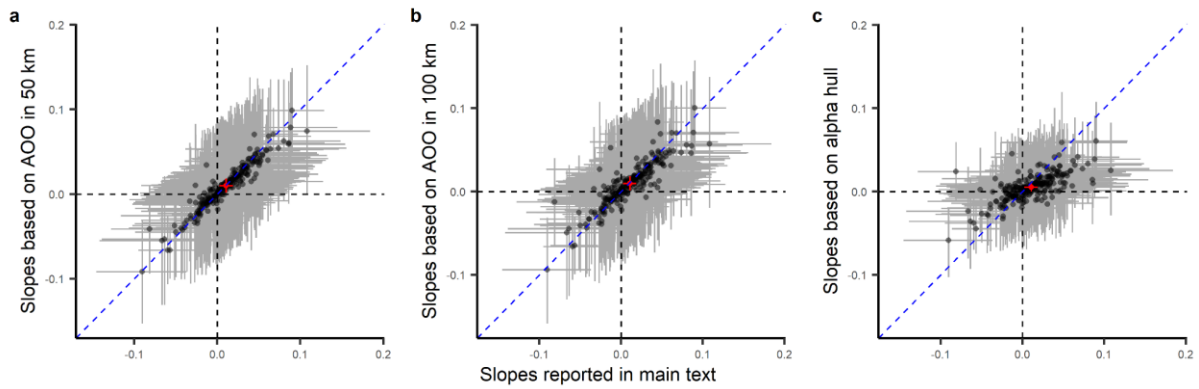

**Supplementary Fig. 7 | Sensitivity analyses for using different estimates of range size.**

Comparison of the slopes reported in the main text (x-axis) with those obtained from analyses using different estimates of range size (y-axis). The main analyses used the area of occupancy (AOO) defined as the number of 10-km grid cells where distribution occurrences were observed. The sensitivity analyses used the AOO in the resolution of 50 km (a) and 100 km (b) and the area of alpha hulls (c). All analyses used 30,103 observations across 238 studies. Black points and gray lines indicate the study-level slope estimates and their 95% credible intervals; the red point and line indicate the overall slope estimate and its 95% credible interval. The blue dashed line indicates the identity line.



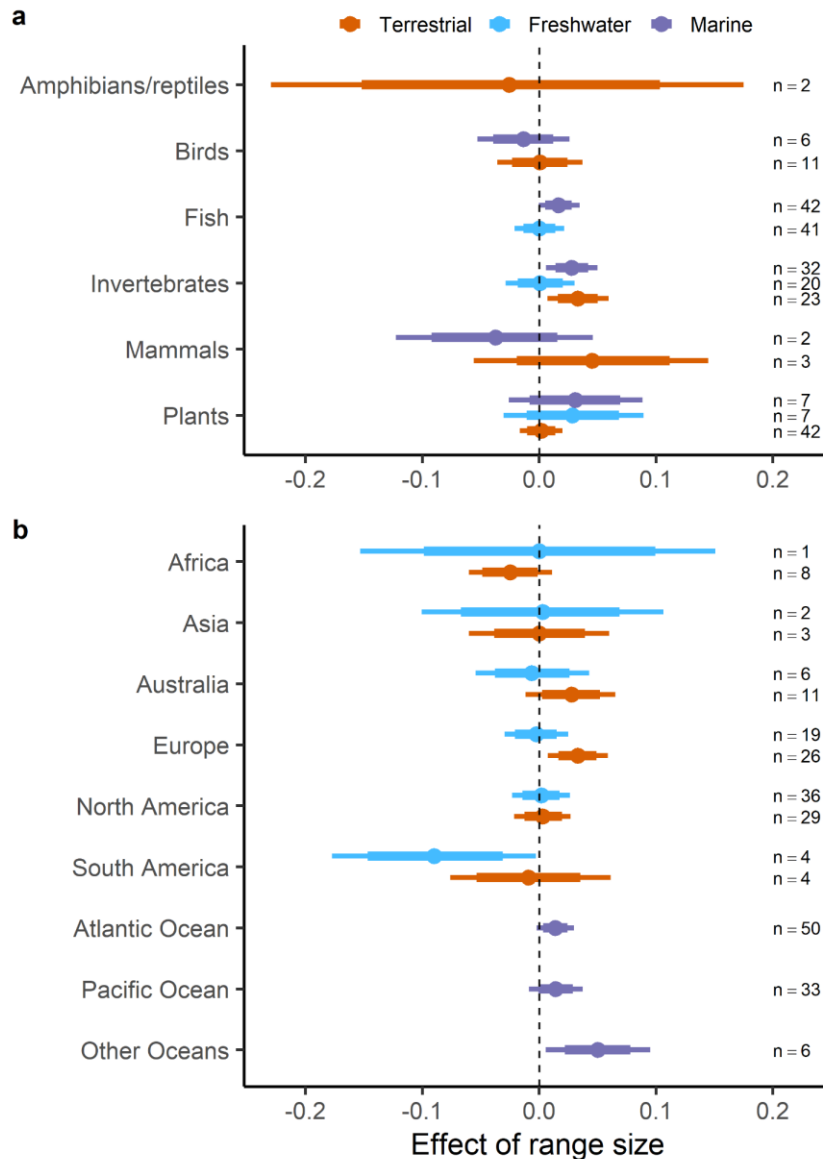

**Supplementary Fig. 8 | Effect of range size on occupancy change across groups of studies.** Studies were grouped by taxon group (**a**), and geographic region (continent and ocean; **b**) for terrestrial (orange), freshwater (blue) and marine (purple) realms. Mean (points), 95% (thick lines) and 80% (thin lines) credible intervals are shown for each group. The dashed line shows the zero slope (no effect of range size). The numbers on the right indicate the number of studies included in each group. We note that each study has at least 10 species-level observations (see Supplementary Table 5 for the number of species in each study), and we thus can estimate the uncertainty in the effects of range size even for groups with only one or two studies.

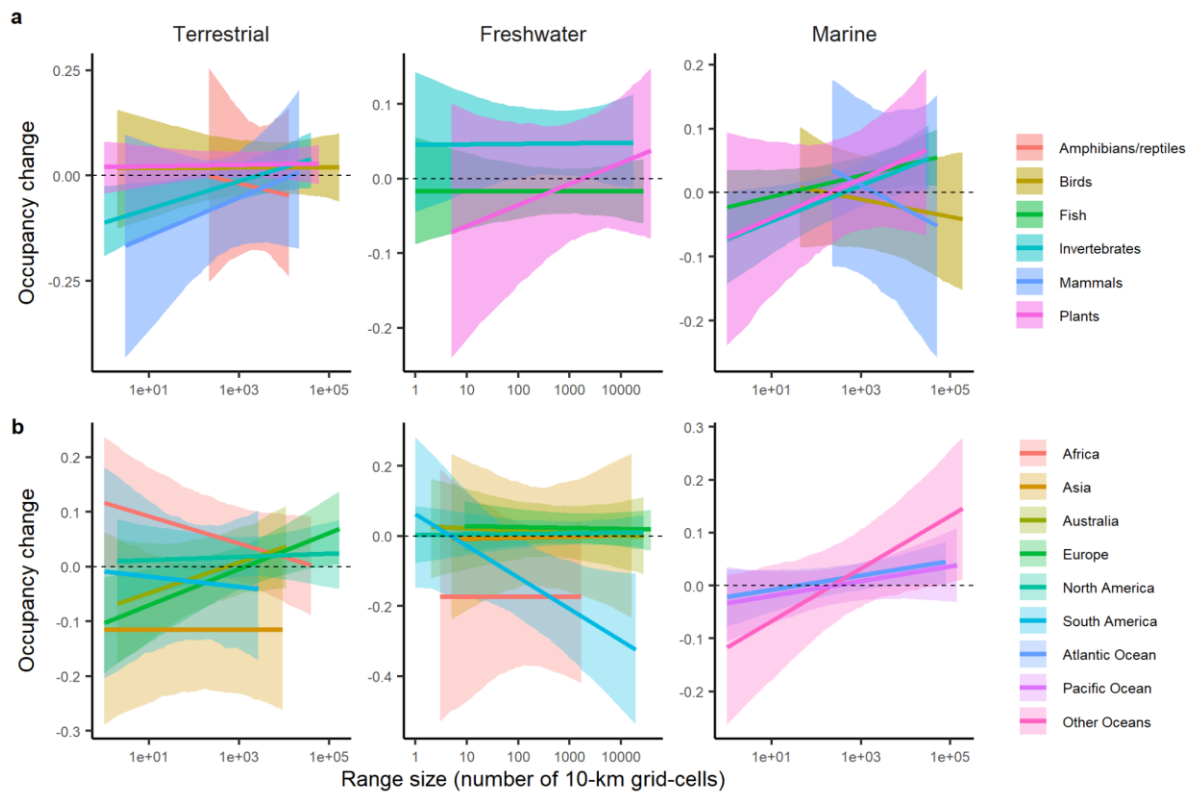

**Supplementary Fig. 9 | The relationship between range size and occupancy change across groups of studies.** Studies were grouped by taxon group (a), and geographic region (continent and ocean; b) for terrestrial, freshwater and marine realms. Occupancy change is the difference in occupancy between the late and early periods, shown as the square root transformed for the absolute magnitude. Solid lines and shading show the range size-occupancy change relationships and 95% credible intervals, respectively.

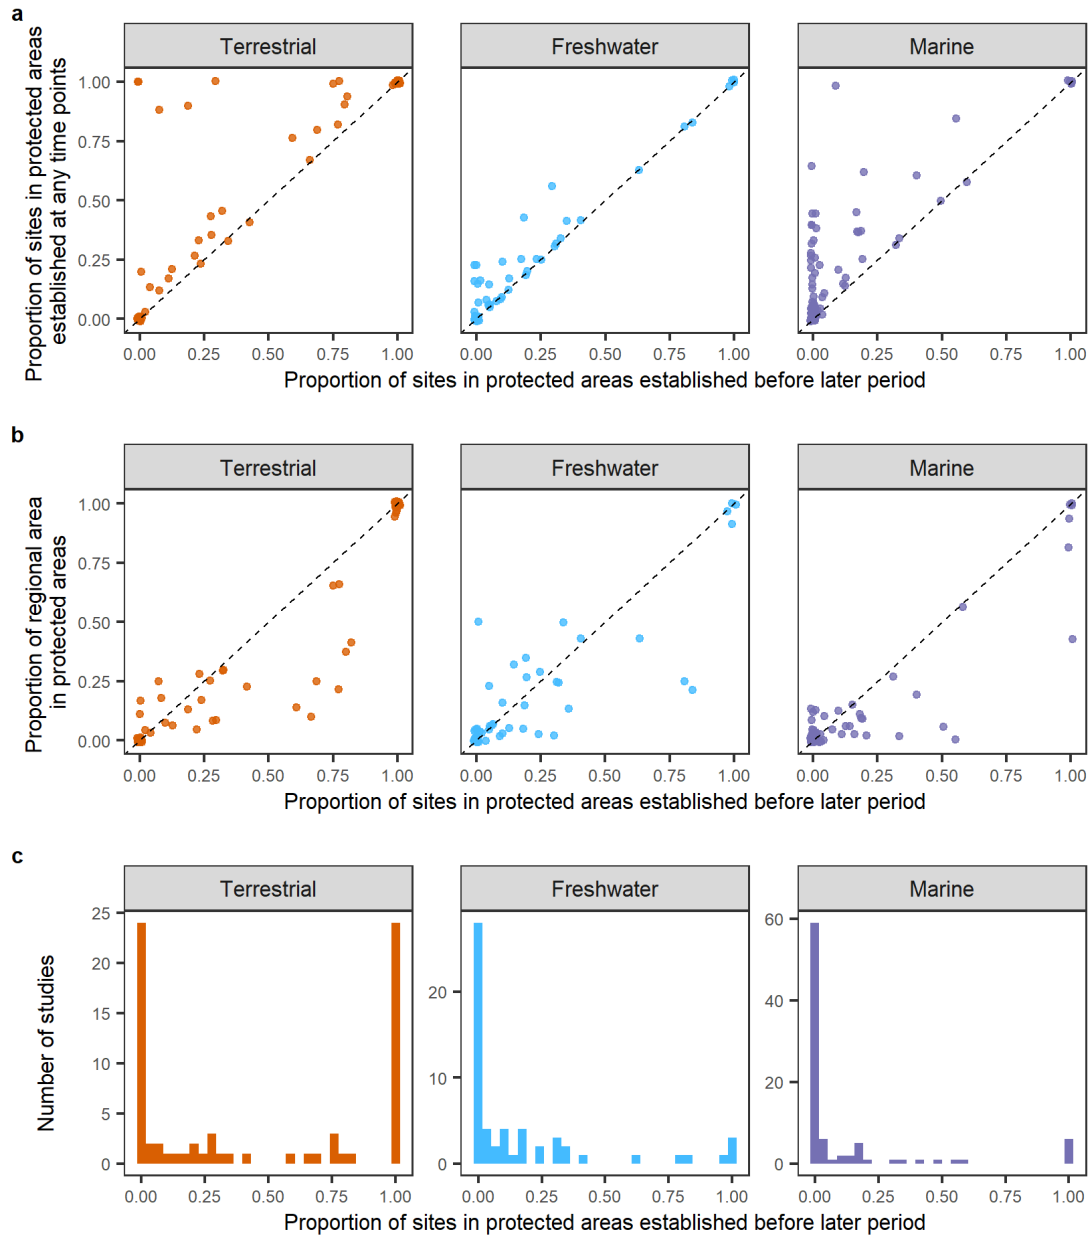

**Supplementary Fig. 10 | Comparison of different estimates measuring the degree to which a metacommunity is protected.** **a** Comparison of the proportion of sites in protected areas established at any time point and those that were established before the sampling in the late period. **b** Comparison of the proportion of local sites and the proportion of the spatial extent of each metacommunity in protected areas that were established before the sampling in the late period. **c** Frequency distribution of the proportion of sites in protected areas that were established before the sampling in the late period. The dashed lines in panels **a** and **b** are the identity line. The comparison was performed for terrestrial (orange), freshwater (blue) and marine (purple) realms, respectively.

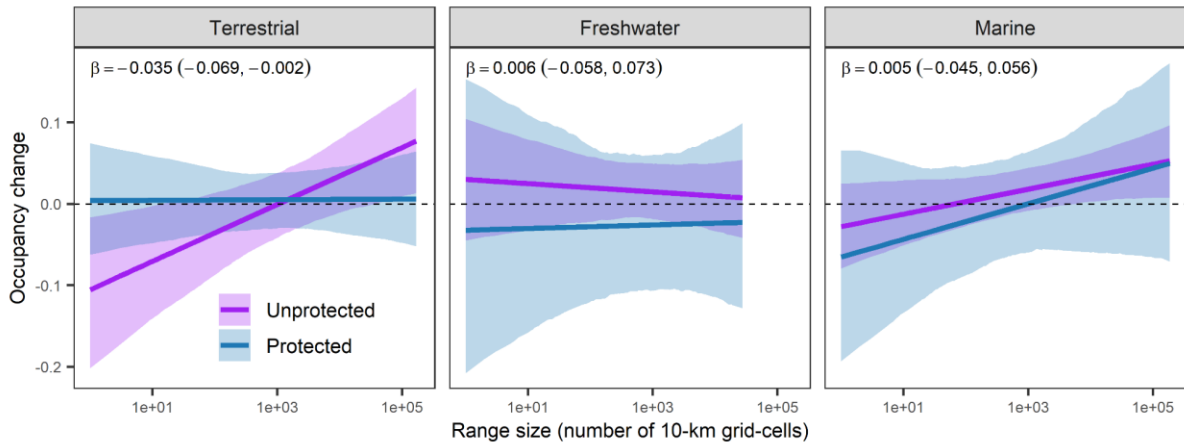

**Supplementary Fig. 11 | Effect of habitat protection on the relationship between range size and occupancy change for terrestrial, freshwater and marine realms.** This result was based on the proportion of sites in protected areas established at any time point, including those that were established more recently. Note that Fig. 3 shows results based on protected areas established before the sampling in the late period. The coefficient ( $\beta$ ) of the interaction between range size and protection level for each realm and its 95% credible interval are shown at the top. The purple solid lines show the predicted relationship when no sites within a metacommunity are protected, while the blue solid lines show the predicted relationship when all sites within a metacommunity are protected; the shading shows the 95% credible intervals.

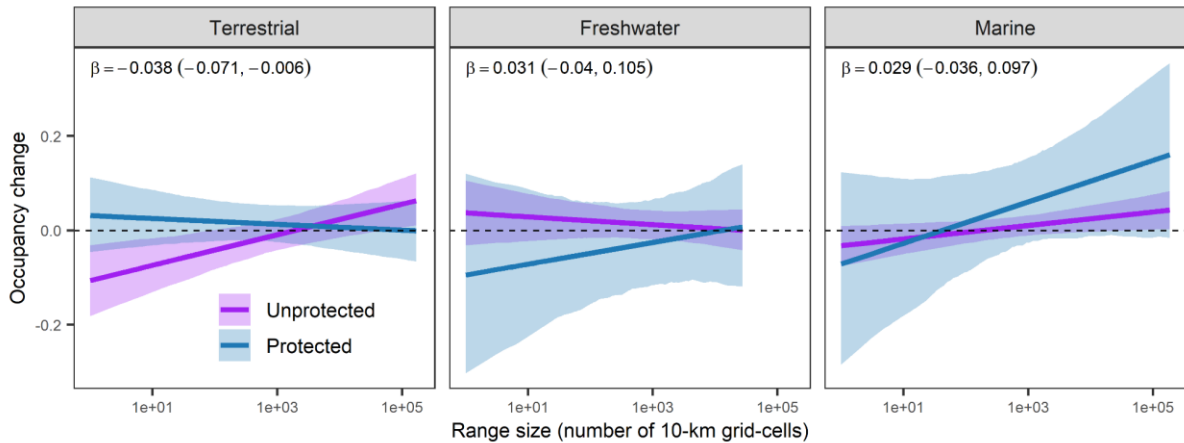

**Supplementary Fig. 12 | Effect of habitat protection on the relationship between range size and occupancy change for terrestrial, freshwater and marine realms.** This result was based on the proportion of the spatial extent of each metacommunity falling within protected areas that were established before the sampling in the late period. Note that Fig. 3 shows results based on the proportion of local sites in protected areas. The coefficient ( $\beta$ ) of the interaction between range size and protection level for each realm and its 95% credible interval are shown at the top. The purple solid lines show the predicted relationship when no sites within a metacommunity are protected, while the blue solid lines show the predicted relationship when all sites within a metacommunity are protected; the shading shows the 95% credible intervals.

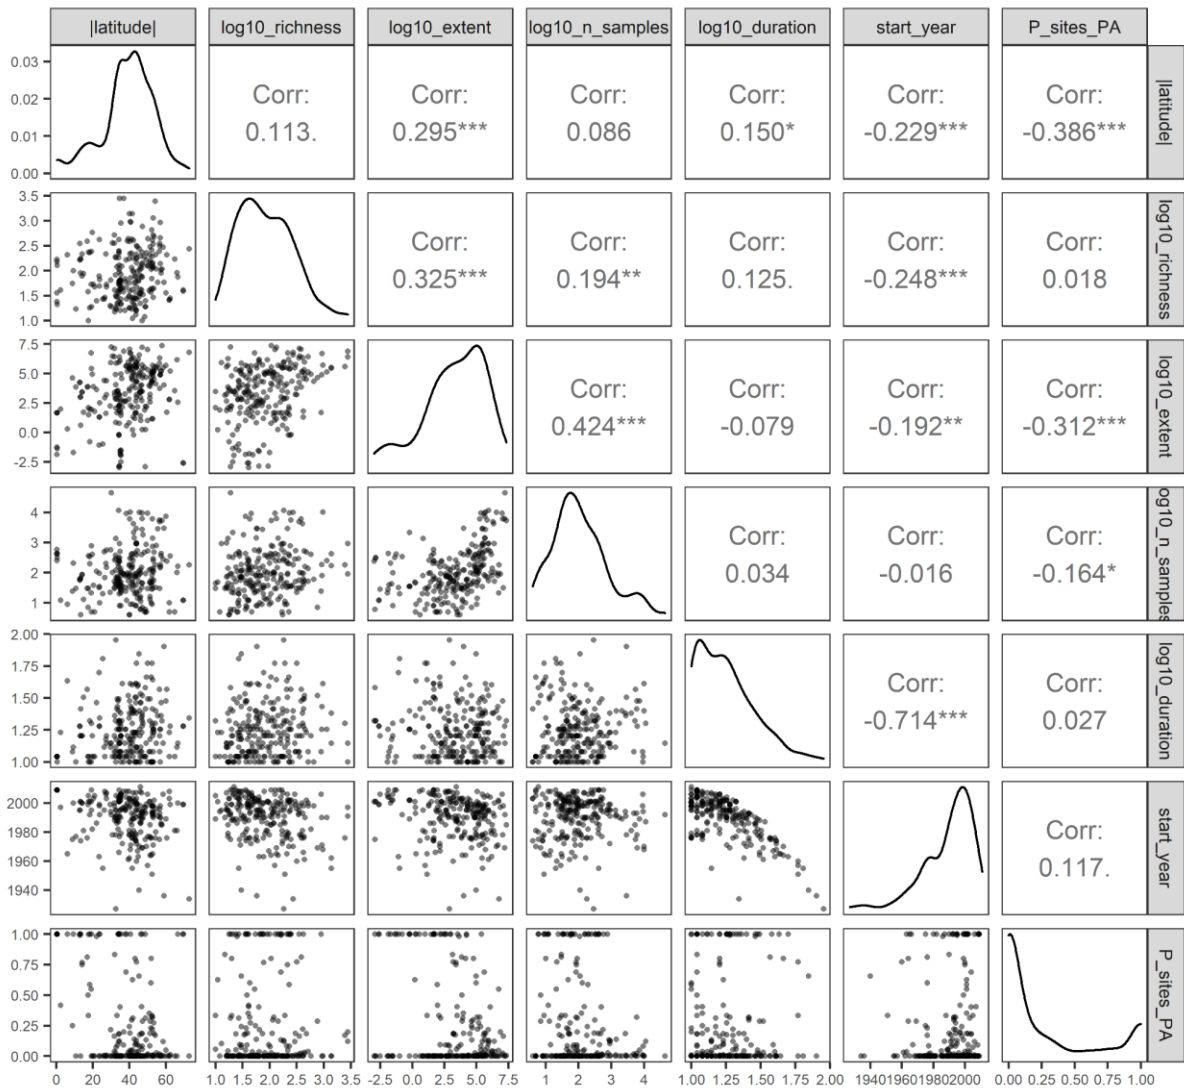

**Supplementary Fig. 13 | Pearson correlations among study characteristics.** The characteristics include absolute central latitude of study sites (`|latitude|`), regional species richness observed in the study (`log10_richness`), extent of study sites (`log10_extent`), number of samples used to calculate occupancy in each period (`log10_n_samples`), duration of sampling (`log10_duration`), start year of sampling (`start_year`), and proportion of sites in protected areas (`P_sites_PA`).

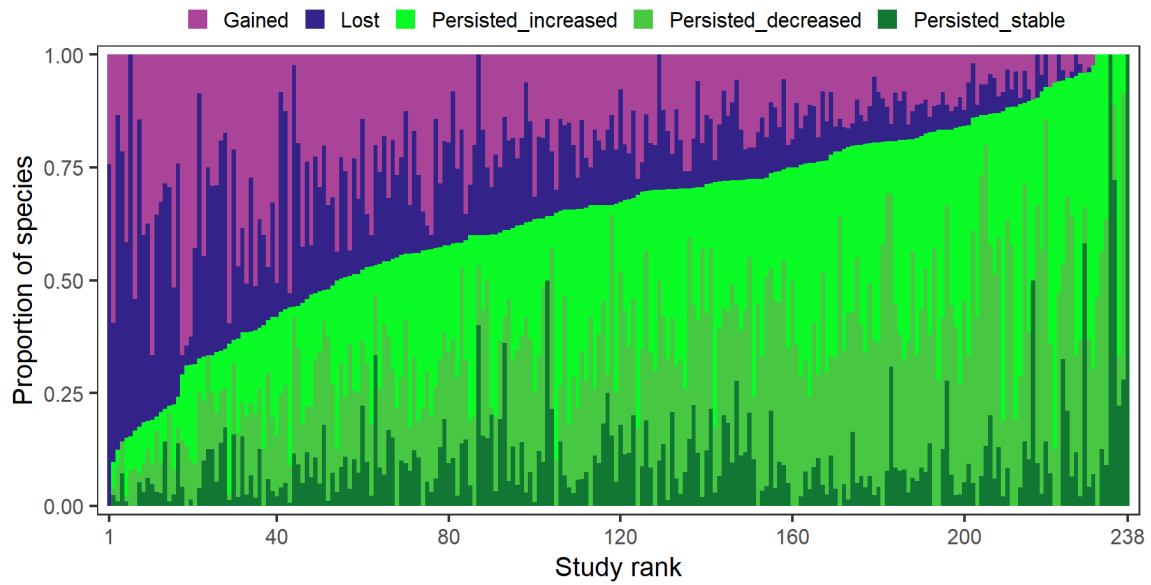

**Supplementary Fig. 14 | Proportion of species experiencing different dynamics within studies.** Dynamics of species were classified as gained (purple), lost (dark blue), persisted with increased occupancy (light green), decreased occupancy (green), and no changed (stable; dark green) occupancy. Each bar represents a study. The medians of the proportion of species in different dynamics are 0.167, 0.120, 0.265, 0.243, and 0.073, respectively. Fifty-four of 238 studies have gained and lost species accounting for more than 50% of total recorded species.

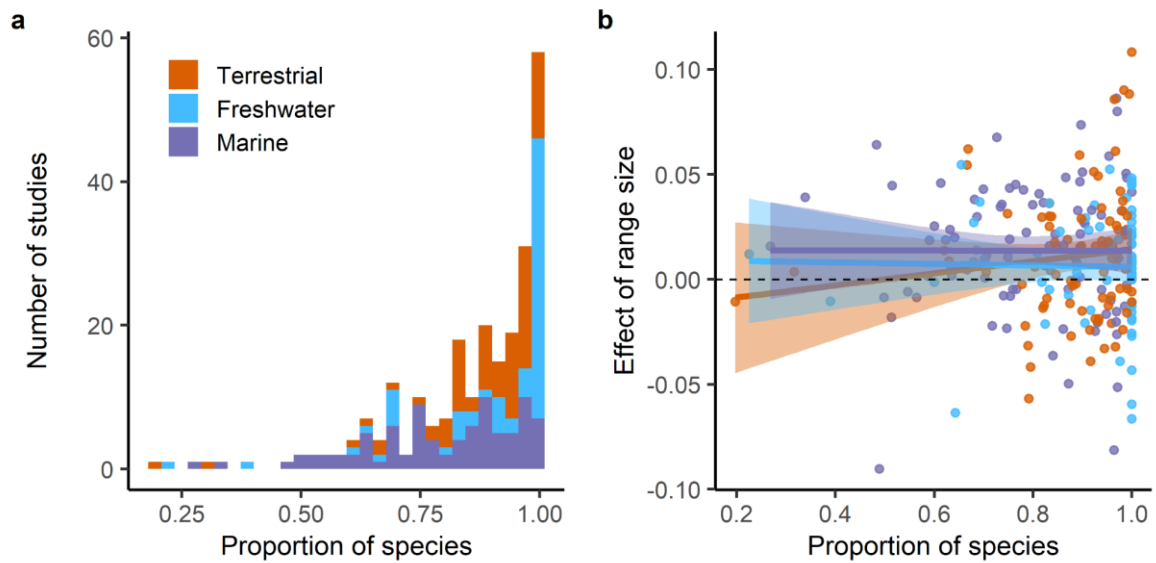

**Supplementary Fig. 15 | Proportion of species within studies that have data on estimates of range size.** (a) Frequency distribution of the proportion of species that have range size estimates and (b) its association with study-level effects of range size on occupancy change. Solid lines and shading in panel b show the linear relationship and 95% credible interval. The colors indicate the terrestrial (orange), freshwater (blue) and marine (purple) realms where studies come from. All linear relationships are not significant (two-sided  $t$ -test,  $p$ -value = 0.25, 0.88 and 0.99 for terrestrial, freshwater and marine realm, respectively).



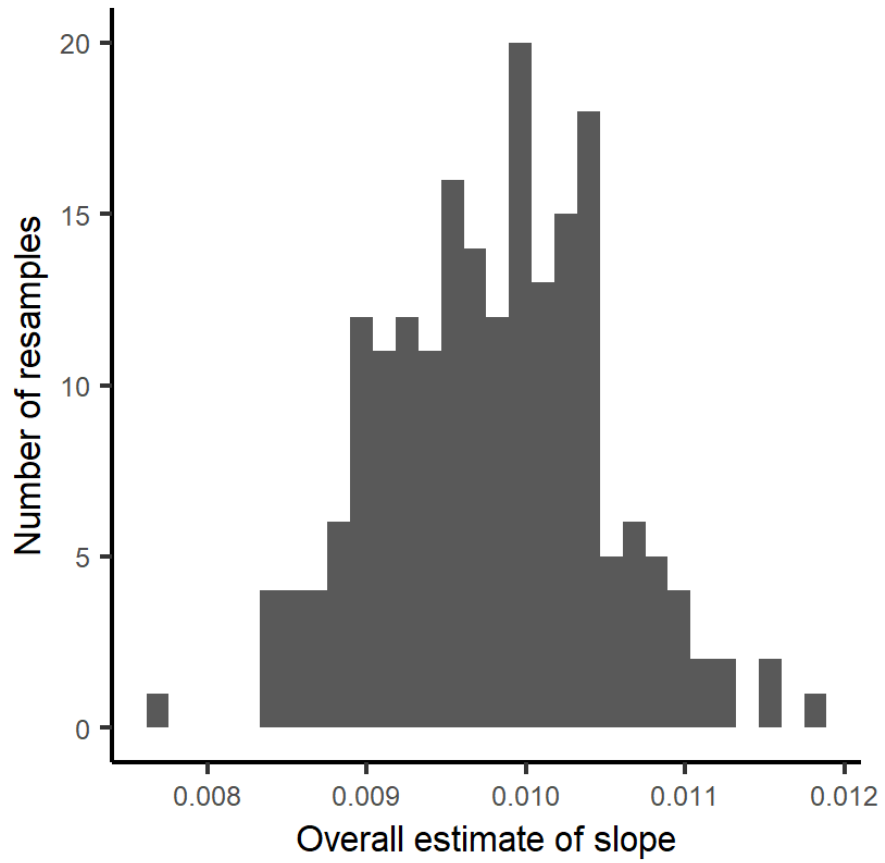

**Supplementary Fig. 16 | Frequency distribution of the overall slope estimate of the relationship between range size and occupancy using datasets from 200 iterations of rarefaction.**

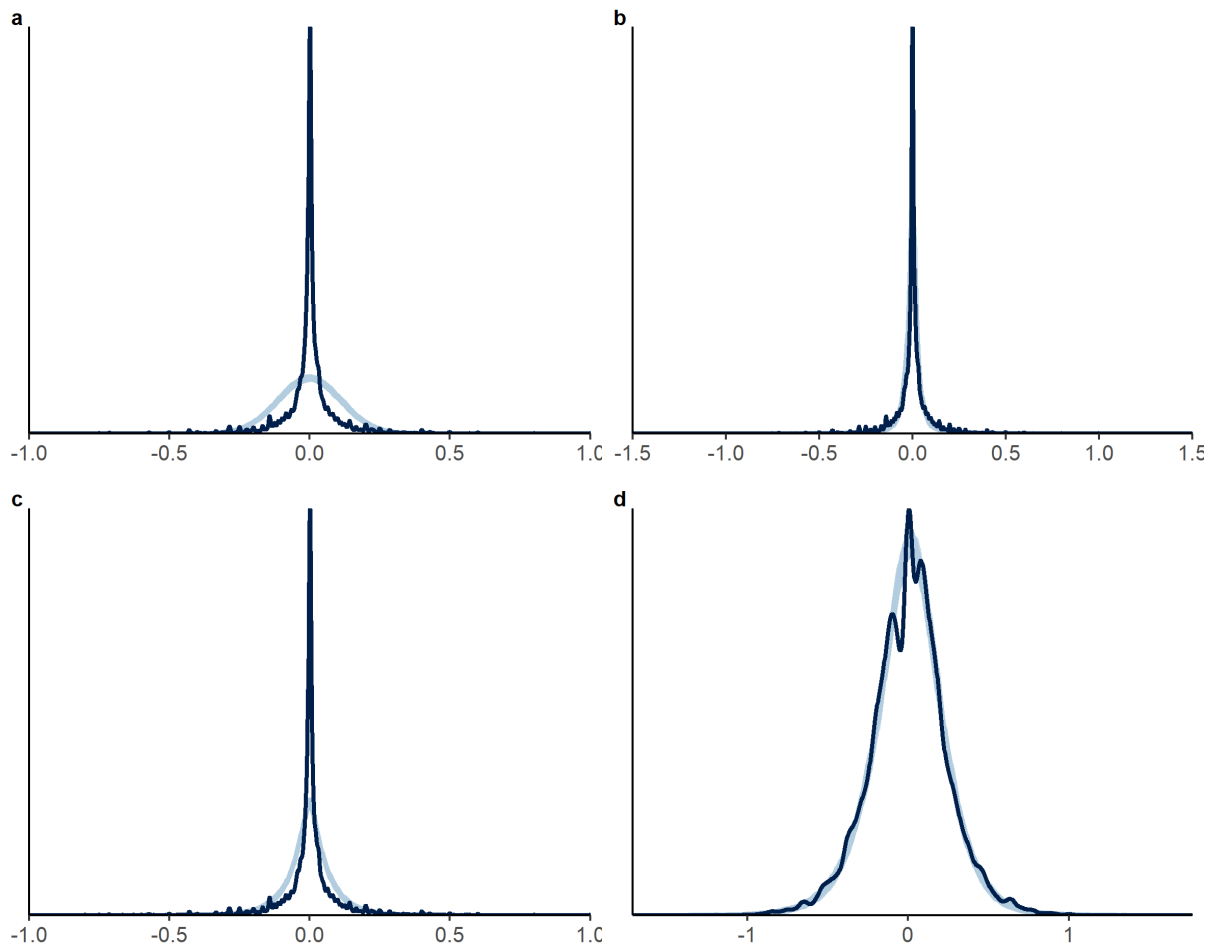

**Supplementary Fig. 17 | Comparing kernel density estimates of the observed occupancy changes (black curves) and predicted occupancy changes (blue curves) drawn from the posterior predictive distribution. a-c** Predicted occupancy changes came from models regressing occupancy change as a function of range size using Gaussian (a), Student's t (b), and asymmetric Laplacian (c) error distributions, respectively. **d** Predicted occupancy changes came from the model regressing  $\text{sign} \times \text{square-root-transformed}$  occupancy change as a function of range size using Gaussian error distribution.

**Supplementary Table 1 | Summary of the model testing the overall effect of range size on temporal occupancy change across 238 studies.** Range size was  $\log_{10}$ -transformed and centered before fitting models.  $n\_samples$  was the  $\log_{10}$ -transformed number of samples in each period, which was used to fit variation in the standard deviation of occupancy changes across studies. For each parameter, the mean estimate, the standard deviation (sd), and the 95% credible interval (Q2.5 and Q97.5) were shown. Rhat is the Gelman-Rubin convergence diagnostic; Bulk- and Tail-ESS are the number of independent samples (i.e., effective sample sizes). The model used 30,103 observations across 238 studies.

| Parameter       | Estimate | sd    | Q2.5   | Q97.5  | Rhat | Bulk_ESS | Tail_ESS |
|-----------------|----------|-------|--------|--------|------|----------|----------|
| Intercept       | 0.008    | 0.006 | -0.005 | 0.020  | 1.00 | 1324     | 1819     |
| sigma_Intercept | -0.680   | 0.011 | -0.702 | -0.658 | 1.00 | 4067     | 3849     |
| Range           | 0.011    | 0.004 | 0.003  | 0.019  | 1.00 | 3318     | 3463     |
| sigma_n_samples | -0.436   | 0.005 | -0.445 | -0.426 | 1.00 | 4034     | 3930     |

**Supplementary Table 2 | Summary of the model testing the variation in effects of range size on temporal occupancy change among terrestrial, freshwater and marine realms.**

The model included interaction between range size and realm. Range size was  $\log_{10}$ -transformed and centered before fitting models.  $n\_samples$  was the  $\log_{10}$ -transformed number of samples in each period, which was used to fit variation in the standard deviation of occupancy changes across studies. For each parameter, the mean estimate, the standard deviation (sd), and the 95% credible interval (Q2.5 and Q97.5) were shown. Rhat is the Gelman-Rubin convergence diagnostic; Bulk- and Tail-ESS are the number of independent samples (i.e., effective sample sizes). The model used 30,103 observations across 238 studies, with 11,714, 4,223 and 14,166 observations in 81, 68 and 89 terrestrial, freshwater and marine studies, respectively.

| Parameter         | Estimate | sd    | Q2.5   | Q97.5  | Rhat | Bulk_ESS | Tail_ESS |
|-------------------|----------|-------|--------|--------|------|----------|----------|
| sigma_Intercept   | -0.680   | 0.011 | -0.702 | -0.658 | 1.00 | 3648     | 3471     |
| Terrestrial       | 0.006    | 0.011 | -0.017 | 0.028  | 1.00 | 2358     | 2956     |
| Freshwater        | 0.004    | 0.012 | -0.020 | 0.029  | 1.00 | 3033     | 3566     |
| Marine            | 0.013    | 0.010 | -0.007 | 0.033  | 1.00 | 1308     | 2036     |
| Terrestrial:Range | 0.012    | 0.007 | -0.002 | 0.025  | 1.00 | 3753     | 3970     |
| Freshwater:Range  | 0.000    | 0.009 | -0.016 | 0.017  | 1.00 | 3400     | 3546     |
| Marine:Range      | 0.017    | 0.006 | 0.004  | 0.029  | 1.00 | 3366     | 3175     |
| sigma_n_samples   | -0.436   | 0.005 | -0.445 | -0.426 | 1.00 | 3728     | 3809     |

**Supplementary Table 3 | Summary of the model testing the effect of habit protection on the relationship between range size and temporal occupancy change for terrestrial, freshwater and marine realms, respectively.** The model included interactions among range size, protection level and realm. The protection level was measured as the proportion of sites in protected areas that were established before the sampling in the late period. Range size was log<sub>10</sub>-transformed and centered before fitting models. n\_samples was the log<sub>10</sub>-transformed number of samples in each period, which was used to fit variation in the standard deviation of occupancy changes across studies. For each parameter, the mean estimate, the standard deviation (sd), and the 95% credible interval (Q2.5 and Q97.5) were shown. Rhat is the Gelman-Rubin convergence diagnostic; Bulk- and Tail-ESS are the number of independent samples (i.e., effective sample sizes). The model used 25,603 observations across 218 studies, with 8,440, 3,072 and 14,091 observations in 72, 58 and 88 terrestrial, freshwater and marine studies, respectively.

| Parameter                    | Estimate | sd    | Q2.5   | Q97.5  | Rhat | Bulk_ESS | Tail_ESS |
|------------------------------|----------|-------|--------|--------|------|----------|----------|
| sigma_Intercept              | -0.648   | 0.012 | -0.671 | -0.624 | 1.00 | 3559     | 3700     |
| Terrestrial                  | -0.016   | 0.018 | -0.053 | 0.019  | 1.00 | 2847     | 3764     |
| Freshwater                   | 0.013    | 0.016 | -0.019 | 0.043  | 1.00 | 2916     | 3519     |
| Marine                       | 0.012    | 0.011 | -0.012 | 0.034  | 1.00 | 1153     | 1849     |
| Terrestrial:Range            | 0.035    | 0.012 | 0.012  | 0.059  | 1.00 | 3597     | 3921     |
| Freshwater:Range             | -0.006   | 0.011 | -0.027 | 0.015  | 1.00 | 3981     | 3970     |
| Marine:Range                 | 0.015    | 0.007 | 0.001  | 0.028  | 1.00 | 2998     | 3629     |
| Terrestrial:Protection       | 0.027    | 0.028 | -0.026 | 0.081  | 1.00 | 2702     | 3132     |
| Freshwater:Protection        | -0.032   | 0.048 | -0.126 | 0.062  | 1.00 | 3769     | 3680     |
| Marine:Protection            | -0.005   | 0.041 | -0.084 | 0.076  | 1.00 | 2839     | 3529     |
| Terrestrial:Range:Protection | -0.039   | 0.017 | -0.073 | -0.005 | 1.00 | 3543     | 3811     |
| Freshwater:Range:Protection  | 0.014    | 0.034 | -0.054 | 0.080  | 1.00 | 3911     | 3962     |
| Marine:Range:Protection      | 0.015    | 0.029 | -0.043 | 0.073  | 1.00 | 3940     | 4101     |
| sigma_n_samples              | -0.438   | 0.005 | -0.448 | -0.428 | 1.00 | 3609     | 3772     |

**Supplementary Table 4 | Summary of the model testing the effects of range size, seven study characteristics (including protection level) and their interactions on temporal occupancy changes for terrestrial, freshwater and marine realms, respectively.** These study characteristics include the proportion of sites in protected areas (protection), absolute central latitude of study sites (latitude), regional species richness (richness), duration of sampling (duration), start year of sampling (start\_year), extent of study sites (extent), and number of samples used to calculate occupancy in each period (n\_samples). The model included an interaction between the realm and all other variables. Range size, richness, duration, extent, and n\_samples were log<sub>10</sub>-transformed. All explanatory variables except the protection variable were centered by subtracting the mean value. For each parameter, the mean estimate, the standard deviation (sd), and the 95% credible interval (Q2.5 and Q97.5) were shown. Rhat is the Gelman-Rubin convergence diagnostic; Bulk- and Tail-ESS are the number of independent samples (i.e., effective sample sizes). The parameters with 95% credible interval non-overlapped with zero were shown in bold. The model used 25,603 observations across 218 studies, with 8,440, 3,072 and 14,091 observations in 72, 58 and 88 terrestrial, freshwater and marine studies, respectively.

| Parameter                  | Estimate       | sd            | Q2.5           | Q97.5          | Rhat | Bulk_ESS | Tail_ESS |
|----------------------------|----------------|---------------|----------------|----------------|------|----------|----------|
| <b>sigma_Intercept</b>     | <b>-0.6482</b> | <b>0.0118</b> | <b>-0.6718</b> | <b>-0.6260</b> | 1.00 | 4064     | 3850     |
| Terrestrial                | -0.0174        | 0.0191        | -0.0537        | 0.0198         | 1.00 | 3179     | 3563     |
| Freshwater                 | 0.0345         | 0.0211        | -0.0069        | 0.0755         | 1.00 | 3342     | 3702     |
| Marine                     | 0.0028         | 0.0146        | -0.0255        | 0.0322         | 1.00 | 2726     | 3416     |
| <b>Terrestrial:Range</b>   | <b>0.0398</b>  | <b>0.0127</b> | <b>0.0147</b>  | <b>0.0650</b>  | 1.00 | 3727     | 3739     |
| Freshwater:Range           | 0.0104         | 0.0134        | -0.0152        | 0.0376         | 1.00 | 3486     | 3776     |
| <b>Marine:Range</b>        | <b>0.0279</b>  | <b>0.0106</b> | <b>0.0073</b>  | <b>0.0487</b>  | 1.00 | 3436     | 3663     |
| Terrestrial:Protection     | 0.0190         | 0.0321        | -0.0448        | 0.0811         | 1.00 | 3202     | 3637     |
| Freshwater:Protection      | -0.0518        | 0.0490        | -0.1497        | 0.0448         | 1.00 | 3735     | 3777     |
| Marine:Protection          | 0.0272         | 0.0449        | -0.0608        | 0.1176         | 1.00 | 3278     | 3630     |
| Terrestrial:Latitude       | -0.0010        | 0.0009        | -0.0027        | 0.0007         | 1.00 | 3513     | 3739     |
| <b>Freshwater:Latitude</b> | <b>0.0031</b>  | <b>0.0015</b> | <b>0.0001</b>  | <b>0.0061</b>  | 1.00 | 3630     | 3845     |
| Marine:Latitude            | 0.0013         | 0.0010        | -0.0005        | 0.0032         | 1.00 | 2740     | 3249     |
| Terrestrial:Richness       | -0.0467        | 0.0309        | -0.1067        | 0.0141         | 1.00 | 3264     | 3668     |
| Freshwater:Richness        | 0.0407         | 0.0431        | -0.0470        | 0.1215         | 1.00 | 3365     | 3158     |
| Marine:Richness            | 0.0197         | 0.0217        | -0.0228        | 0.0624         | 1.00 | 2787     | 3335     |
| Terrestrial:Duration       | -0.0355        | 0.1252        | -0.2699        | 0.2141         | 1.00 | 3660     | 3692     |
| Freshwater:Duration        | 0.0461         | 0.1172        | -0.1849        | 0.2797         | 1.00 | 3590     | 3813     |
| Marine:Duration            | 0.0812         | 0.0761        | -0.0707        | 0.2295         | 1.00 | 2685     | 3603     |
| Terrestrial:Start_year     | -0.0004        | 0.0017        | -0.0037        | 0.0028         | 1.00 | 3711     | 3727     |
| Freshwater:Start_year      | -0.0007        | 0.0017        | -0.0041        | 0.0027         | 1.00 | 3794     | 4015     |
| Marine:Start_year          | 0.0001         | 0.0011        | -0.0019        | 0.0023         | 1.00 | 2769     | 3631     |

| Parameter                           | Estimate       | sd            | Q2.5           | Q97.5          | Rhat | Bulk_ESS    | Tail_ESS    |
|-------------------------------------|----------------|---------------|----------------|----------------|------|-------------|-------------|
| Terrestrial:Extent                  | -0.0030        | 0.0060        | -0.0143        | 0.0088         | 1.00 | 3278        | 3659        |
| Freshwater:Extent                   | -0.0096        | 0.0108        | -0.0306        | 0.0114         | 1.00 | 3418        | 3814        |
| Marine:Extent                       | -0.0093        | 0.0062        | -0.0218        | 0.0028         | 1.00 | 2893        | 3694        |
| Terrestrial:n_samples               | 0.0101         | 0.0201        | -0.0305        | 0.0493         | 1.00 | 3423        | 3800        |
| Freshwater:n_samples                | -0.0033        | 0.0304        | -0.0616        | 0.0571         | 1.00 | 2836        | 3545        |
| <b>Marine:n_samples</b>             | <b>0.0295</b>  | <b>0.0139</b> | <b>0.0026</b>  | <b>0.0567</b>  | 1.00 | 2629        | 3631        |
| <b>Terrestrial:Range:Protection</b> | <b>-0.0473</b> | <b>0.0217</b> | <b>-0.0900</b> | <b>-0.0050</b> | 1.00 | 3713        | 3853        |
| Freshwater:Range:Protection         | 0.0288         | 0.0360        | -0.0419        | 0.0995         | 1.00 | 3744        | 3510        |
| Marine:Range:Protection             | 0.0031         | 0.0320        | -0.0603        | 0.0657         | 1.00 | 3779        | 3575        |
| Terrestrial:Range:Latitude          | -0.0005        | 0.0006        | -0.0017        | 0.0007         | 1.00 | 3919        | 3712        |
| Freshwater:Range:Latitude           | -0.0019        | 0.0010        | -0.0038        | 0.0001         | 1.00 | 3876        | 3971        |
| Marine:Range:Latitude               | -0.0007        | 0.0006        | -0.0019        | 0.0005         | 1.00 | 3599        | 3569        |
| Terrestrial:Range:Richness          | 0.0014         | 0.0189        | -0.0373        | 0.0394         | 1.00 | 3656        | 3835        |
| <b>Freshwater:Range:Richness</b>    | <b>0.0540</b>  | <b>0.0268</b> | <b>0.0007</b>  | <b>0.1056</b>  | 1.00 | 3684        | 3546        |
| Marine:Range:Richness               | -0.0003        | 0.0133        | -0.0260        | 0.0262         | 1.00 | 3356        | 3552        |
| Terrestrial:Range:Duration          | -0.0233        | 0.0793        | -0.1833        | 0.1324         | 1.00 | 3644        | 4055        |
| Freshwater:Range:Duration           | -0.0743        | 0.0799        | -0.2314        | 0.0824         | 1.00 | 3919        | 4059        |
| Marine:Range:Duration               | -0.0400        | 0.0459        | -0.1335        | 0.0495         | 1.00 | 3529        | 3813        |
| Terrestrial:Range:Start_year        | -0.0010        | 0.0010        | -0.0031        | 0.0010         | 1.00 | 3630        | 3833        |
| Freshwater:Range:Start_year         | -0.0012        | 0.0012        | -0.0035        | 0.0012         | 1.00 | 3911        | 3738        |
| <b>Marine:Range:Start_year</b>      | <b>-0.0012</b> | <b>0.0006</b> | <b>-0.0024</b> | <b>-0.0001</b> | 1.00 | 3604        | 3675        |
| Terrestrial:Range:Extent            | 0.0019         | 0.0039        | -0.0056        | 0.0095         | 1.00 | 3769        | 3571        |
| Freshwater:Range:Extent             | -0.0087        | 0.0073        | -0.0228        | 0.0058         | 1.00 | 3837        | 3852        |
| Marine:Range:Extent                 | -0.0055        | 0.0041        | -0.0139        | 0.0025         | 1.00 | 3683        | 3617        |
| Terrestrial:Range:n_samples         | -0.0196        | 0.0121        | -0.0429        | 0.0043         | 1.00 | 4015        | 3930        |
| Freshwater:Range:n_samples          | 0.0246         | 0.0203        | -0.0150        | 0.0637         | 1.00 | 3755        | 3739        |
| Marine:Range:n_samples              | -0.0133        | 0.0085        | -0.0301        | 0.0033         | 1.00 | 3563        | 3776        |
| <b>sigma_n_samples</b>              | <b>-0.4374</b> | <b>0.0049</b> | <b>-0.4468</b> | <b>-0.4276</b> | 1.00 | <b>4065</b> | <b>3927</b> |

**Supplementary Table 5 | Details on the datasets used in this study.**

| Database | StudyID | Start year | End year | Nr yrs | Nr spp | Realm       | Taxon         | Region        | Reference |
|----------|---------|------------|----------|--------|--------|-------------|---------------|---------------|-----------|
| bt       | 108     | 1985       | 2005     | 10     | 93     | Marine      | Birds         | Indian Ocean  | 1         |
| bt       | ††110   | 1976       | 1995     | 13     | 1889   | Marine      | Invertebrates | Atlantic      | 2         |
| bt       | 112     | 1992       | 2005     | 14     | 17     | Marine      | Fish          | Atlantic      | 3         |
| bt       | 113     | 1971       | 1997     | 6      | 675    | Marine      | Invertebrates | Atlantic      | 4         |
| bt       | 117     | 1963       | 2002     | 7      | 57     | Marine      | Invertebrates | Pacific       | 5         |
| bt       | 119     | 1978       | 2009     | 32     | 171    | Marine      | Fish          | Atlantic      | 6         |
| bt       | 121     | 2001       | 2010     | 6      | 47     | Marine      | Fish          | Pacific       | 7         |
| bt       | 123     | 2000       | 2009     | 10     | 127    | Marine      | Fish          | Atlantic      | 8         |
| bt       | 125     | 1990       | 2000     | 9      | 77     | Marine      | Fish          | Atlantic      | 9         |
| bt       | 135     | 1977       | 1986     | 3      | 13     | Marine      | Fish          | Atlantic      | 10        |
| bt       | 147     | 1961       | 1993     | 16     | 372    | Marine      | Invertebrates | Pacific       | 11        |
| bt       | 148     | 1981       | 2004     | 18     | 380    | Marine      | Fish          | Pacific       | 12        |
| bt       | 152     | 1979       | 1988     | 8      | 12     | Marine      | Invertebrates | Pacific       | 13        |
| bt       | ††162   | 1991       | 2004     | 9      | 1390   | Marine      | Invertebrates | Atlantic      | 14        |
| bt       | ††163   | 1993       | 2004     | 12     | 241    | Marine      | Fish          | Pacific       | 15        |
| bt       | †166    | 1969       | 1987     | 9      | 101    | Marine      | Birds         | Atlantic      | 16,17     |
| bt       | †169    | 1987       | 2006     | 18     | 152    | Marine      | Birds         | Pacific       | 18-20     |
| bt       | 171     | 1995       | 2007     | 13     | 20     | Marine      | Mammals       | Atlantic      | 21        |
| bt       | †172    | 1998       | 2009     | 12     | 33     | Marine      | Mammals       | Atlantic      | 22,23     |
| bt       | 173     | 2000       | 2011     | 9      | 139    | Marine      | Invertebrates | Pacific       | 24        |
| bt       | 176     | 1999       | 2010     | 12     | 165    | Marine      | Invertebrates | Atlantic      | 25        |
| bt       | 178     | 1977       | 2007     | 14     | 307    | Marine      | Fish          | Pacific       | 26        |
| bt       | 180     | 1970       | 1994     | 24     | 269    | Marine      | Fish          | Atlantic      | 27        |
| bt       | †182    | 1990       | 2009     | 19     | 32     | Marine      | Fish          | Atlantic      | 28        |
| bt       | 183     | 1999       | 2011     | 13     | 13     | Marine      | Invertebrates | Atlantic      | 29        |
| bt       | ††187   | 1997       | 2006     | 5      | 1645   | Marine      | Invertebrates | Atlantic      | 30        |
| bt       | 189     | 2001       | 2010     | 9      | 205    | Marine      | Fish          | Atlantic      | 31        |
| bt       | 190     | 2001       | 2010     | 10     | 201    | Marine      | Fish          | Atlantic      | 32        |
| bt       | 191     | 1955       | 1968     | 11     | 810    | Marine      | Invertebrates | Atlantic      | 33        |
| bt       | 195     | 1978       | 2007     | 30     | 378    | Terrestrial | Birds         | North America | 34        |
| bt       | ††196   | 1976       | 2012     | 35     | 131    | Marine      | Invertebrates | Atlantic      | 35        |
| bt       | 197     | 1985       | 2013     | 28     | 101    | Marine      | Fish          | Atlantic      | 36        |
| bt       | 198     | 1991       | 2013     | 22     | 55     | Marine      | Fish          | Atlantic      | 37        |
| bt       | 200     | 1962       | 1985     | 10     | 888    | Marine      | Invertebrates | Atlantic      | 33        |
| bt       | ††204   | 1977       | 1997     | 6      | 155    | Marine      | Invertebrates | Atlantic      | 38        |



| Database | StudyID | Start year | End year | Nr yrs | Nr spp | Realm       | Taxon                   | Region         | Reference |
|----------|---------|------------|----------|--------|--------|-------------|-------------------------|----------------|-----------|
| bt       | 206     | 1993       | 2008     | 16     | 107    | Marine      | Fish                    | Atlantic       | 39        |
| bt       | 208     | 1997       | 2007     | 11     | 181    | Marine      | Fish                    | Atlantic       | 40        |
| bt       | 209     | 1991       | 2007     | 17     | 129    | Marine      | Fish                    | Atlantic       | 41        |
| bt       | 210     | 1975       | 2011     | 37     | 185    | Marine      | Fish                    | Atlantic       | 42        |
| bt       | ††213   | 1968       | 2008     | 41     | 678    | Marine      | Fish                    | Atlantic       | 43        |
| bt       | 214     | 1940       | 2009     | 42     | 29     | Terrestrial | Plants                  | North America  | 44        |
| bt       | 215     | 1985       | 2008     | 22     | 16     | Terrestrial | Birds                   | North America  | 45        |
| bt       | 217     | 1994       | 2004     | 7      | 205    | Terrestrial | Birds                   | North America  | 46        |
| bt       | 219     | 1995       | 2011     | 17     | 11     | Terrestrial | Amphibians and reptiles | North America  | 47        |
| bt       | 220     | 1995       | 2011     | 14     | 180    | Terrestrial | Birds                   | North America  | 47        |
| bt       | 229     | 1990       | 2013     | 19     | 61     | Freshwater  | Fish                    | North America  | 48        |
| bt       | 232     | 1981       | 1993     | 7      | 68     | Marine      | Fish                    | Southern Ocean | 49        |
| bt       | 237     | 1976       | 1985     | 10     | 54     | Freshwater  | Invertebrates           | North America  | 50        |
| bt       | 244     | 1999       | 2012     | 14     | 142    | Marine      | Birds                   | Pacific        | 51        |
| bt       | 247     | 1975       | 2006     | 31     | 18     | Freshwater  | Invertebrates           | North America  | 52        |
| bt       | 252     | 1978       | 1989     | 11     | 31     | Marine      | Fish                    | Atlantic       | 53        |
| bt       | 253     | 1986       | 2014     | 29     | 72     | Freshwater  | Invertebrates           | North America  | 54        |
| bt       | 256     | 1996       | 2009     | 14     | 100    | Marine      | Fish                    | Atlantic       | 41        |
| bt       | 271     | 2001       | 2014     | 14     | 54     | Marine      | Fish                    | Pacific        | 55        |
| bt       | 272     | 2004       | 2014     | 11     | 32     | Marine      | Invertebrates           | Pacific        | 56        |
| bt       | 273     | 2004       | 2014     | 11     | 20     | Marine      | Invertebrates           | Pacific        | 57        |
| bt       | †274    | 2001       | 2014     | 14     | 81     | Marine      | Invertebrates           | Pacific        | 58        |
| bt       | 278     | 1979       | 1990     | 7      | 216    | Marine      | Fish                    | Pacific        | 12        |
| bt       | 286     | 2000       | 2009     | 9      | 18     | Marine      | Fish                    | Atlantic       | 8         |
| bt       | 288     | 1972       | 1995     | 20     | 142    | Marine      | Fish                    | Atlantic       | 6         |
| bt       | 290     | 1978       | 1988     | 4      | 170    | Marine      | Fish                    | Pacific        | 59        |
| bt       | 291     | 1978       | 1988     | 2      | 349    | Marine      | Fish                    | Indian Ocean   | 59        |
| bt       | 292     | 1978       | 1989     | 4      | 98     | Marine      | Fish                    | Pacific        | 59        |
| bt       | 297     | 2005       | 2015     | 11     | 10     | Marine      | Invertebrates           | Pacific        | 60        |
| bt       | 300     | 1989       | 2013     | 25     | 14     | Terrestrial | Invertebrates           | North America  | 61        |
| bt       | 304     | 1966       | 1996     | 2      | 418    | Terrestrial | Plants                  | Africa         | 62-64     |
| bt       | 309     | 1976       | 1985     | 10     | 42     | Terrestrial | Invertebrates           | Europe         | 65        |
| bt       | 321     | 1995       | 2007     | 13     | 16     | Terrestrial | Mammals                 | North America  | 66        |
| bt       | 331     | 1998       | 2009     | 4      | 35     | Terrestrial | Plants                  | North America  | 67-70     |
| bt       | 354     | 1998       | 2013     | 4      | 174    | Marine      | Plants                  | Pacific        | 71        |
| bt       | 356     | 1976       | 2012     | 21     | 372    | Terrestrial | Plants                  | Australia      | 72        |

| Database | StudyID | Start year | End year | Nr yrs | Nr spp | Realm       | Taxon         | Region        | Reference |
|----------|---------|------------|----------|--------|--------|-------------|---------------|---------------|-----------|
| bt       | 359     | 2001       | 2012     | 12     | 46     | Marine      | Fish          | Pacific       | 56        |
| bt       | 374     | 2004       | 2014     | 11     | 61     | Marine      | Birds         | Pacific       | 73        |
| bt       | 375     | 2004       | 2014     | 11     | 115    | Terrestrial | Invertebrates | Asia          | 74        |
| bt       | 418     | 1995       | 2014     | 16     | 241    | Marine      | Fish          | Pacific       | 75        |
| bt       | 428     | 1936       | 2015     | 75     | 49     | Marine      | Fish          | Atlantic      | 76-79     |
| bt       | 430     | 1992       | 2016     | 22     | 47     | Freshwater  | Fish          | Australia     | 80        |
| bt       | 431     | 1997       | 2011     | 13     | 34     | Freshwater  | Fish          | Australia     | 80        |
| bt       | 432     | 1998       | 2012     | 14     | 25     | Freshwater  | Fish          | Australia     | 80        |
| bt       | 466     | 1986       | 2008     | 20     | 89     | Marine      | Fish          | Atlantic      | 81        |
| bt       | 467     | 1987       | 1999     | 4      | 71     | Marine      | Fish          | Atlantic      | 82-85     |
| bt       | ††468   | 1986       | 2011     | 21     | 73     | Marine      | Invertebrates | Pacific       | 86        |
| bt       | ††469   | 1982       | 2011     | 30     | 37     | Marine      | Invertebrates | Pacific       | 87        |
| bt       | 499     | 1985       | 1999     | 9      | 116    | Marine      | Invertebrates | Atlantic      | 88        |
| bt       | 500     | 2001       | 2012     | 11     | 203    | Marine      | Invertebrates | Atlantic      | 89        |
| bt       | †505    | 1991       | 2011     | 7      | 164    | Marine      | Fish          | Atlantic      | 90        |
| bt       | 507     | 1988       | 2010     | 19     | 32     | Marine      | Fish          | Atlantic      | 91        |
| bt       | 512     | 1964       | 1994     | 2      | 136    | Terrestrial | Plants        | Europe        | 92,93     |
| bt       | 516     | 1997       | 2013     | 4      | 41     | Terrestrial | Mammals       | South America | 94-97     |
| bt       | 525     | 1986       | 2014     | 4      | 25     | Freshwater  | Plants        | Asia          | 98        |
| bt       | †527    | 2006       | 2015     | 10     | 95     | Marine      | Birds         | Atlantic      | 99        |
| bt       | 67      | 1994       | 2006     | 13     | 57     | Terrestrial | Birds         | Africa        | 100       |
| bt       | ††78    | 1980       | 2004     | 20     | 192    | Marine      | Invertebrates | Atlantic      | 101       |
| bt       | 84      | 1967       | 2005     | 5      | 95     | Marine      | Plants        | Atlantic      | 102       |
| bt       | 85      | 1992       | 2003     | 11     | 256    | Marine      | Invertebrates | Atlantic      | 103       |
| bt       | 86      | 1986       | 1998     | 5      | 135    | Marine      | Plants        | Atlantic      | 104       |
| bt       | 90      | 1995       | 2004     | 3      | 21     | Marine      | Invertebrates | Atlantic      | 105       |
| bt       | ††92    | 1981       | 1991     | 4      | 165    | Marine      | Invertebrates | Arctic Ocean  | 106       |
| bt       | 97      | 1934       | 1955     | 2      | 140    | Marine      | Invertebrates | Arctic Ocean  | 107       |
| bt       | 99      | 1982       | 1997     | 10     | 557    | Marine      | Fish          | Indian Ocean  | 108       |
| ft       | 1       | 2003       | 2017     | 3      | 27     | Freshwater  | Fish          | Europe        | 109-111   |
| ft       | 10      | 1988       | 2018     | 28     | 22     | Freshwater  | Fish          | North America | 112,113   |
| ft       | 11      | 1988       | 2005     | 16     | 20     | Freshwater  | Fish          | North America | 114       |
| ft       | 14      | 1999       | 2014     | 14     | 20     | Freshwater  | Fish          | Asia          | 115       |
| ft       | 15      | 2001       | 2017     | 5      | 93     | Freshwater  | Fish          | North America | 116       |
| ft       | 16      | 1991       | 2008     | 2      | 34     | Freshwater  | Fish          | Europe        | 117       |
| ft       | 17      | 1975       | 1986     | 12     | 55     | Freshwater  | Fish          | Africa        | 118       |
| ft       | 18      | 1977       | 1988     | 6      | 57     | Freshwater  | Fish          | North America | 119       |

| Database | StudyID | Start year | End year | Nr yrs | Nr spp | Realm       | Taxon         | Region        | Reference |
|----------|---------|------------|----------|--------|--------|-------------|---------------|---------------|-----------|
| ft       | 2       | 2003       | 2013     | 2      | 53     | Freshwater  | Fish          | South America | 120,121   |
| ft       | 20      | 1995       | 2013     | 15     | 56     | Freshwater  | Fish          | North America | 122       |
| ft       | 21      | 1993       | 2018     | 26     | 115    | Freshwater  | Fish          | North America | 123       |
| ft       | 23      | 2005       | 2019     | 8      | 30     | Freshwater  | Fish          | Australia     | 124       |
| ft       | 24      | 2008       | 2018     | 3      | 80     | Freshwater  | Fish          | North America | 125       |
| ft       | 25      | 1989       | 2009     | 12     | 10     | Freshwater  | Fish          | North America | 126       |
| ft       | 26      | 2002       | 2015     | 11     | 217    | Freshwater  | Fish          | North America | 127       |
| ft       | 27      | 1993       | 2018     | 24     | 43     | Freshwater  | Fish          | Europe        | 128       |
| ft       | 28      | 1996       | 2016     | 7      | 123    | Freshwater  | Fish          | North America | 129       |
| ft       | 29      | 2009       | 2019     | 3      | 19     | Freshwater  | Fish          | South America | 130       |
| ft       | 30      | 1979       | 1994     | 15     | 83     | Freshwater  | Fish          | North America | 131,132   |
| ft       | 32      | 1994       | 2017     | 24     | 74     | Freshwater  | Fish          | Europe        | 133       |
| ft       | 34      | 2002       | 2018     | 17     | 28     | Freshwater  | Fish          | Europe        | 134       |
| ft       | 36      | 1992       | 2018     | 20     | 30     | Freshwater  | Fish          | North America | 135       |
| ft       | 37      | 1999       | 2012     | 2      | 19     | Freshwater  | Fish          | South America | 136       |
| ft       | 39      | 2003       | 2015     | 5      | 48     | Freshwater  | Fish          | North America | 137       |
| ft       | 4       | 2007       | 2018     | 11     | 41     | Freshwater  | Fish          | Europe        | 138       |
| ft       | 41      | 1990       | 2000     | 11     | 15     | Freshwater  | Fish          | North America | 139       |
| ft       | 42      | 1989       | 2018     | 30     | 36     | Freshwater  | Fish          | Europe        | 140       |
| ft       | 43      | 2001       | 2017     | 17     | 11     | Freshwater  | Fish          | Europe        | 141,142   |
| ft       | 45      | 1995       | 2008     | 12     | 16     | Freshwater  | Fish          | North America | 143       |
| ft       | 46      | 2001       | 2012     | 7      | 40     | Freshwater  | Fish          | Europe        | 144,145   |
| ft       | 5       | 1981       | 2002     | 21     | 57     | Freshwater  | Fish          | North America | 146       |
| ft       | 6       | 2003       | 2018     | 16     | 53     | Freshwater  | Fish          | Australia     | 147       |
| ft       | 7       | 1999       | 2017     | 16     | 28     | Freshwater  | Fish          | Europe        | 148       |
| ft       | 9       | 2008       | 2018     | 9      | 27     | Freshwater  | Fish          | North America | 149       |
| ic       | 1006    | 1993       | 2012     | 18     | 398    | Terrestrial | Invertebrates | Europe        | 150       |
| ic       | 1102    | 1965       | 2008     | 12     | 134    | Terrestrial | Invertebrates | Europe        | 151       |
| ic       | 1263    | 1994       | 2011     | 17     | 41     | Terrestrial | Invertebrates | Europe        | 152       |
| ic       | 1267    | 1994       | 2012     | 13     | 112    | Terrestrial | Invertebrates | Europe        | 153       |
| ic       | 1340    | 1969       | 2001     | 4      | 755    | Terrestrial | Invertebrates | Europe        | 154       |
| ic       | 1367    | 1980       | 2008     | 2      | 36     | Terrestrial | Invertebrates | Europe        | 155       |
| ic       | 1408    | 2000       | 2013     | 14     | 73     | Freshwater  | Invertebrates | Europe        | 156       |
| ic       | 1444    | 1989       | 2008     | 17     | 22     | Freshwater  | Invertebrates | Australia     | 157       |
| ic       | 1474    | 1951       | 2009     | 2      | 190    | Terrestrial | Invertebrates | Europe        | 158       |
| ic       | 1475    | 1964       | 2009     | 2      | 104    | Terrestrial | Invertebrates | Europe        | 159       |
| ic       | 1488    | 2006       | 2019     | 13     | 287    | Freshwater  | Invertebrates | Europe        | 160       |

| Database | StudyID | Start year | End year | Nr yrs | Nr spp | Realm       | Taxon         | Region        | Reference |
|----------|---------|------------|----------|--------|--------|-------------|---------------|---------------|-----------|
| ic       | 1520    | 1976       | 2015     | 36     | 38     | Freshwater  | Invertebrates | North America | 161       |
| ic       | 1525    | 2008       | 2019     | 12     | 29     | Freshwater  | Invertebrates | North America | 162       |
| ic       | 1526_1  | 2008       | 2018     | 10     | 19     | Freshwater  | Invertebrates | North America | 163       |
| ic       | 1526_2  | 2007       | 2020     | 9      | 38     | Freshwater  | Invertebrates | North America | 164       |
| ic       | 1533    | 1955       | 2018     | 2      | 17     | Terrestrial | Invertebrates | South America | 165       |
| ic       | 1542    | 2002       | 2018     | 17     | 472    | Freshwater  | Invertebrates | Europe        | 166       |
| ic       | 1547    | 2006       | 2017     | 8      | 820    | Terrestrial | Invertebrates | Asia          | 167,168   |
| ic       | 1553    | 1989       | 2004     | 15     | 29     | Freshwater  | Invertebrates | North America | 169       |
| ic       | 1554    | 2008       | 2018     | 11     | 38     | Freshwater  | Invertebrates | North America | 170       |
| ic       | 1555    | 2007       | 2019     | 13     | 16     | Freshwater  | Invertebrates | North America | 171       |
| ic       | 502     | 1971       | 1988     | 18     | 18     | Terrestrial | Invertebrates | Europe        | 172       |
| ic       | 79      | 1976       | 1985     | 9      | 36     | Terrestrial | Invertebrates | Europe        | 172       |
| mr       | *sfd_11 | 2009       | 2019     | 9      | 23     | Terrestrial | Plants        | Africa        | 173,174   |
| mr       | sfd_12  | 2009       | 2018     | 8      | 20     | Terrestrial | Plants        | Africa        | 173,174   |
| mr       | sfd_13  | 2009       | 2019     | 9      | 33     | Terrestrial | Plants        | Africa        | 173,174   |
| mr       | sfd_131 | 2003       | 2012     | 2      | 15     | Freshwater  | Plants        | North America | 175,176   |
| mr       | sfd_156 | 1999       | 2017     | 8      | 38     | Terrestrial | Plants        | North America | 177,178   |
| mr       | sfd_157 | 1999       | 2017     | 8      | 32     | Terrestrial | Plants        | North America | 177,178   |
| mr       | sfd_158 | 2000       | 2015     | 4      | 389    | Terrestrial | Plants        | North America | 179       |
| mr       | sfd_159 | 2001       | 2021     | 21     | 57     | Marine      | Fish          | Pacific       | 180       |
| mr       | sfd_160 | 2001       | 2021     | 21     | 79     | Marine      | Invertebrates | Pacific       | 180       |
| mr       | sfd_161 | 2001       | 2021     | 21     | 26     | Marine      | Plants        | Pacific       | 180       |
| mr       | sfd_163 | 1995       | 2013     | 3      | 312    | Terrestrial | Plants        | Australia     | 181       |
| mr       | sfd_164 | 2001       | 2016     | 4      | 155    | Terrestrial | Plants        | Australia     | 181       |
| mr       | sfd_165 | 2000       | 2015     | 4      | 193    | Terrestrial | Plants        | Australia     | 181       |
| mr       | sfd_166 | 1995       | 2013     | 3      | 158    | Terrestrial | Plants        | Australia     | 181       |
| mr       | sfd_167 | 2001       | 2016     | 4      | 86     | Terrestrial | Plants        | Australia     | 181       |
| mr       | sfd_168 | 2000       | 2015     | 4      | 74     | Terrestrial | Plants        | Australia     | 181       |
| mr       | sfd_169 | 1995       | 2012     | 3      | 58     | Terrestrial | Birds         | Europe        | 182       |
| mr       | sfd_17  | 2009       | 2019     | 11     | 134    | Terrestrial | Plants        | Africa        | 173,174   |
| mr       | sfd_170 | 1995       | 2012     | 5      | 66     | Terrestrial | Birds         | Europe        | 182       |
| mr       | sfd_172 | 2006       | 2020     | 12     | 187    | Terrestrial | Plants        | North America | 183       |
| mr       | sfd_173 | 1974       | 2014     | 4      | 29     | Marine      | Plants        | Atlantic      | 184       |
| mr       | sfd_174 | 1974       | 2014     | 4      | 19     | Marine      | Invertebrates | Atlantic      | 184       |
| mr       | sfd_175 | 2007       | 2017     | 2      | 166    | Terrestrial | Plants        | Europe        | 185       |
| mr       | sfd_176 | 1993       | 2018     | 4      | 14     | Marine      | Plants        | Pacific       | 98        |

| Database | StudyID | Start year | End year | Nr yrs | Nr spp | Realm       | Taxon         | Region        | Reference |
|----------|---------|------------|----------|--------|--------|-------------|---------------|---------------|-----------|
| mr       | sfd 178 | 1987       | 2020     | 4      | 24     | Freshwater  | Plants        | North America | 186       |
| mr       | sfd 179 | 2011       | 2020     | 2      | 18     | Freshwater  | Invertebrates | North America | 186       |
| mr       | sfd 18  | 2009       | 2019     | 11     | 112    | Terrestrial | Plants        | Africa        | 173,174   |
| mr       | sfd 180 | 1963       | 2012     | 27     | 44     | Marine      | Invertebrates | Pacific       | 187       |
| mr       | sfd 183 | 1957       | 2015     | 2      | 122    | Terrestrial | Plants        | Europe        | 188       |
| mr       | sfd 186 | 1998       | 2016     | 15     | 133    | Terrestrial | Plants        | Australia     | 189       |
| mr       | sfd 187 | 1999       | 2017     | 7      | 46     | Terrestrial | Mammals       | Australia     | 190       |
| mr       | sfd 19  | 2009       | 2019     | 11     | 152    | Terrestrial | Plants        | Africa        | 173,174   |
| mr       | sfd 194 | 1992       | 2012     | 20     | 14     | Terrestrial | Invertebrates | South America | 191       |
| mr       | sfd 195 | 2002       | 2019     | 16     | 183    | Terrestrial | Invertebrates | North America | 192       |
| mr       | sfd 196 | 2002       | 2019     | 16     | 190    | Terrestrial | Invertebrates | North America | 192       |
| mr       | sfd 197 | 2002       | 2019     | 16     | 196    | Terrestrial | Invertebrates | North America | 192       |
| mr       | sfd 20  | 1999       | 2009     | 2      | 24     | Marine      | Invertebrates | Atlantic      | 193       |
| mr       | sfd 21  | 1974       | 1999     | 2      | 157    | Marine      | Fish          | Pacific       | 194       |
| mr       | sfd 27  | 1997       | 2007     | 3      | 15     | Marine      | Plants        | Pacific       | 195       |
| mr       | sfd 28  | 1981       | 2012     | 2      | 75     | Marine      | Fish          | Pacific       | 196       |
| mr       | sfd 29  | 1990       | 2018     | 4      | 30     | Freshwater  | Invertebrates | North America | 197       |
| mr       | sfd 30  | 1996       | 2009     | 2      | 16     | Freshwater  | Fish          | North America | 198       |
| mr       | sfd 31  | 1965       | 2007     | 2      | 139    | Terrestrial | Invertebrates | Asia          | 199       |
| mr       | sfd 32  | 1927       | 2016     | 17     | 137    | Terrestrial | Plants        | North America | 200       |
| mr       | sfd 33  | 1970       | 2015     | 2      | 218    | Terrestrial | Plants        | Europe        | 201       |
| mr       | sfd 34  | 1998       | 2007     | 2      | 351    | Freshwater  | Invertebrates | Europe        | 202-204   |
| mr       | sfd 35  | 1990       | 2007     | 3      | 308    | Freshwater  | Invertebrates | Europe        | 202-204   |
| mr       | sfd 36  | 1998       | 2007     | 2      | 180    | Freshwater  | Invertebrates | Europe        | 202-204   |
| mr       | sfd 37  | 1998       | 2007     | 2      | 107    | Freshwater  | Plants        | Europe        | 205,206   |
| mr       | sfd 38  | 1998       | 2007     | 2      | 126    | Freshwater  | Plants        | Europe        | 205,206   |
| mr       | sfd 39  | 1998       | 2007     | 2      | 59     | Freshwater  | Plants        | Europe        | 205,206   |
| mr       | sfd 40  | 1990       | 2007     | 3      | 902    | Terrestrial | Plants        | Europe        | 207       |
| mr       | sfd 41  | 1990       | 2007     | 3      | 725    | Terrestrial | Plants        | Europe        | 207       |
| mr       | sfd 42  | 1998       | 2007     | 2      | 524    | Terrestrial | Plants        | Europe        | 207       |
| mr       | sfd 44  | 2009       | 2019     | 10     | 100    | Terrestrial | Birds         | North America | 208       |
| mr       | sfd 47  | 1996       | 2011     | 6      | 247    | Marine      | Invertebrates | Atlantic      | 209       |
| mr       | sfd 48  | 1991       | 2006     | 3      | 102    | Terrestrial | Birds         | Europe        | 210       |
| mr       | sfd 49  | 1993       | 2009     | 7      | 76     | Terrestrial | Birds         | Europe        | 210       |
| mr       | sfd 50  | 1990       | 2011     | 4      | 111    | Terrestrial | Birds         | Europe        | 210       |
| mr       | sfd 51  | 1992       | 2013     | 5      | 13     | Terrestrial | Invertebrates | Australia     | 211       |
| mr       | sfd 53  | 1975       | 2012     | 4      | 17     | Marine      | Fish          | Pacific       | 212       |

| Database | StudyID | Start year | End year | Nr yrs | Nr spp | Realm       | Taxon                   | Region        | Reference |
|----------|---------|------------|----------|--------|--------|-------------|-------------------------|---------------|-----------|
| mr       | sfd_54  | 1990       | 2014     | 10     | 54     | Terrestrial | Plants                  | Australia     | 213       |
| mr       | sfd_55  | 2008       | 2018     | 3      | 25     | Terrestrial | Invertebrates           | Europe        | 214       |
| mr       | sfd_56  | 2003       | 2019     | 2      | 24     | Terrestrial | Invertebrates           | Europe        | 214       |
| mr       | sfd_57  | 1976       | 2001     | 2      | 354    | Terrestrial | Plants                  | North America | 215       |
| mr       | sfd_58  | 1960       | 2018     | 2      | 314    | Terrestrial | Plants                  | Europe        | 216       |
| mr       | sfd_59  | 1995       | 2004     | 10     | 14     | Terrestrial | Amphibians and reptiles | North America | 217       |
| mr       | sfd_60  | 2005       | 2015     | 2      | 45     | Freshwater  | Fish                    | South America | 218       |
| mr       | sfd_62  | 1994       | 2004     | 2      | 10     | Terrestrial | Plants                  | North America | 219       |
| mr       | sfd_63  | 1972       | 2012     | 6      | 43     | Freshwater  | Fish                    | North America | 220       |
| mr       | sfd_64  | 2000       | 2012     | 2      | 96     | Terrestrial | Plants                  | South America | 221       |
| mr       | sfd_65  | 2004       | 2021     | 9      | 44     | Terrestrial | Plants                  | North America | 222       |
| mr       | sfd_66  | 2004       | 2015     | 10     | 37     | Terrestrial | Plants                  | North America | 222       |
| mr       | sfd_67  | 2002       | 2016     | 14     | 54     | Terrestrial | Plants                  | North America | 222       |
| mr       | sfd_74  | 2006       | 2015     | 6      | 18     | Terrestrial | Plants                  | North America | 222       |
| mr       | sfd_75  | 2002       | 2021     | 19     | 51     | Terrestrial | Plants                  | North America | 222       |
| mr       | sfd_76  | 2006       | 2021     | 15     | 36     | Terrestrial | Plants                  | North America | 222       |
| mr       | sfd_78  | 2006       | 2021     | 14     | 20     | Terrestrial | Plants                  | North America | 222       |
| mr       | sfd_81  | 2006       | 2021     | 5      | 25     | Terrestrial | Plants                  | North America | 222       |
| mr       | sfd_82  | 1993       | 2015     | 20     | 32     | Freshwater  | Invertebrates           | North America | 223       |
| mr       | sfd_86  | 2003       | 2012     | 2      | 16     | Freshwater  | Plants                  | North America | 175,176   |

Note: four databases were used: bt - BioTIME, ft - RivFishTIME, it - InsectChange, mr- Metacommunity Resurveys. † These studies were classified as ‘multiple taxa’ in the original data sources; †† These studies were classified as ‘benthos’ in the original data sources. \* The prefix ‘sfd’ of StudyID indicates the self-defined ID in this study to keep the format of these datasets consistent with other datasets. Nr yrs: number of years that a given metacommunity was sampled; Nr spp: number of species with range size estimates in a given metacommunity.

## Supplementary References

- 1 Australian Antarctic Data Centre. Seabirds of the Southern and South Indian Ocean. Occurrence dataset. GBIF.org <https://doi.org/10.15468/tu0dcw> (2022).
- 2 Network, N. B. Joint Nature Conservation Committee - Marine Nature Conservation Review (MNCR) and associated benthic marine data held and managed by JNCC. Occurrence dataset. GBIF.org <https://doi.org/10.15468/ocjqwy> (2012).
- 3 Ocean Biodiversity Information System. South Western Pacific Regional OBIS Data Asteroid Subset (South Western Pacific OBIS). Occurrence dataset. GBIF.org <https://doi.org/10.15468/notzfl> (2012).
- 4 Pugh, P. Discovery Collections Midwater Database. National Oceanography Centre <https://obis.org/dataset/2e9e9830-d7cf-43f3-ba38-12ac06a7c0ba> (2000).
- 5 US National Oceanographic Data Center. South TX Outer Continental Shelf and MI, AL, and FL Outer Continental Shelf benthic organism sampling 1974-1978. US National Oceanographic Data Center <https://obis.org/dataset/982d4bc2-c3f1-4018-befd-ed34b101e4b1> (2011).
- 6 Clark, D. & Branton, B. DFO Maritimes Research Vessel Trawl Surveys. OBIS Canada <https://www.gbif.org/dataset/86711916-f762-11e1-a439-00145eb45e9a> (2007).
- 7 Coral Reef Ecosystem Division (CRED), Pacific Island Fisheries Sciences Center and NOAA National Marine Fisheries Service. CRED Towed-Diver Fish Biomass Surveys in the Pacific Ocean 2000-2010. OBIS <https://obis.org/dataset/1d3d2e69-3256-44c4-af75-ca6491f795c6> (2011).
- 8 Sherman, S. Maine Department of Marine Resources Inshore Trawl Survey, 2000-2009. Maine Department of Marine Resources <https://www.usgs.gov/ocean-biodiversity-information-system-usa> (2010).
- 9 Reichert, M. SCDNR/NOAA MARMAP Program, SCDNR MARMAP Aggregate Data Surveys, The Marine Resources Monitoring, Assessment, and Prediction (MARMAP) Program: MARMAP Chevron Trap Survey 1990-2009. Marine Resources Research Institute <https://obis.org/dataset/d1dd65ec-fc75-480d-ab5d-4a4379603173> (2009).
- 10 Tropical and Subtropical Western South Atlantic OBIS. Previous Fisheries REVIZEE Program. v2.0. OBIS <http://doi.org/10.25607/fkn6ys> (2018).
- 11 Ocean Biodiversity Information System. South Western Pacific Regional OBIS Data Bryozoan Subset (South Western Pacific OBIS). Occurrence dataset. GBIF.org <https://doi.org/10.15468/w2u8ek> (2012).
- 12 Ocean Biodiversity Information System. South Western Pacific Regional OBIS Data provider for the NIWA Marine Biodata Information System. Occurrence Dataset. GBIF.org <https://doi.org/10.15468/zuuiyu> (2012).
- 13 Nishida, S. CMarZ (Census of Marine Zooplankton)-Asia Database. National Museum of Nature and Science, Japan [https://www.godac.jamstec.go.jp/bismal/e/dataset/cmarz\\_asia](https://www.godac.jamstec.go.jp/bismal/e/dataset/cmarz_asia) (2013).
- 14 U.S. Environmental Protection Agency. Environmental Monitoring and Assessment Program (EMAP) Database. OBIS <https://obis.org/dataset/41a50544-957c-4193-8bbf-25a25f749e85> (2012).
- 15 United States Geological Survey. NOAA AFSC North Pacific Groundfish Observer. GBIF.org <https://doi.org/10.15468/bg83kc> (2012).
- 16 Read, A. J., Halpin, P. N., Crowder, L. B., Best, B. D. & Fujioka, E. OBIS-SEAMAP: mapping marine mammals, birds and turtles. World Wide Web electronic publication <http://seamap.env.duke.edu> (2010).

- 17 Hyrenbach, D., Huettmann, F. & Chardine, J. PIROP Northwest Atlantic 1965-1992. OBIS-SEAMAP <http://seamap.env.duke.edu/dataset/280> (2012).
- 18 Rintoul, C., Schlagenhauf-Langabeer, B., Hyrenbach, K., Morgan, K. & Sydeman, W. *Atlas of California Current marine birds and mammals: Version 1, Unpublished report*. (PRBO Conservation Science, Petaluma, California, 2006).
- 19 Yen, P. P., Sydeman, W. J. & Hyrenbach, K. D. Marine bird and cetacean associations with bathymetric habitats and shallow-water topographies: implications for trophic transfer and conservation. *J. Mar. Syst.* **50**, 79-99 (2004).
- 20 Yen, P., Sydeman, W., Bograd, S. & Hyrenbach, K. Spring-time distributions of migratory marine birds in the southern California Current: Oceanic eddy associations and coastal habitat hotspots over 17 years. *Deep Sea Research Part II: Topical Studies in Oceanography* **53**, 399-418 (2006).
- 21 Dunn, C. Bahamas Marine Mammal Research Organisation Opportunistic Sightings. OBIS-SEAMAP <http://seamap.env.duke.edu/dataset/329> (2013).
- 22 Machete, M. POPA cetacean, seabird, and sea turtle sightings in the Azores area 1998-2015. <http://seamap.env.duke.edu/dataset/704> (2016).
- 23 Morato, T. et al. Evidence of a seamount effect on aggregating visitors. *Mar. Ecol. Prog. Ser.* **357**, 23-32 (2008).
- 24 Japan Agency for Marine-Earth Science and Technology. Marine Biological Sample Database. OBIS Japan <https://obis.org/node/0d07a0ea-9c75-48e8-b3fd-c28d653f4270> (2012).
- 25 Kennedy, M. K. & Spry, J. A. BioChem: Atlantic Zone Monitoring Program (AZMP) Maritimes Region zooplankton collection. OBIS <https://obis.org/dataset/f9a6159e-d03b-45f2-a44a-eafb791e5987> (2011).
- 26 Boutillier, J. A. & PBS Shellfish Data Unit. Pacific Shrimp Trawl Survey. OBIS Canada Digital Collections, OBIS SEAMAP <http://seamap.env.duke.edu/dataset/103150261> (2012).
- 27 Brown, S. K. R., Zwanenburg, K. & Branton, R. ECNASAP East Coast of North America Groundfish data, East Coast North America Strategic Assessment Project. OBIS <http://ipt.iobis.org/obiscanada/resource?r=ecnasap> (accessed 2012).
- 28 Wade, E. J. DFO Gulf Region Snow Crab Research Trawl Surveys. OBIS Canada Digital Collections <https://obis.org/dataset/b2fe1445-9bb8-4849-962b-0696d0e3e29f> (2011).
- 29 Tremblay, J. M. & Branton, B. DFO Maritimes Research Vessel Trawl Surveys Invertebrate Observations. OBIS Canada Digital Collections <https://www.eurobis.org/imis?module=dataset&dased=4131> (2007).
- 30 National Centers for Coastal Ocean Science (NCCOS). National Benthic Infaunal Database (NBID). NOAA National Centers for Environmental Information <https://www.fisheries.noaa.gov/inport/item/38811> (2003).
- 31 National Centers for Coastal Ocean Science. St. John, USVI Fish Assessment and Monitoring Data (2002 - Present). NOAA National Centers for Environmental Information <https://obis.org/dataset/a9114765-9e28-4a43-9987-4fd9f398748a> (2007).
- 32 National Centers for Coastal Ocean Science. St. Croix, USVI Fish Assessment and Monitoring Data (2002 - Present). NOAA National Centers for Environmental Information <https://www.fisheries.noaa.gov/inport/item/39197> (2007).
- 33 Northeast Fisheries Science Center, National Marine Fisheries Service, NOAA & U.S. Department of Commerce. NEFSC Benthic Database. OBIS <https://obis.org/dataset/e7c86904-aac7-4a17-a895-99a54c430d80> (2010).
- 34 Pardieck, K. L., Ziolkowski Jr., D. J. and Hudson, M.-A. R. North American Breeding Bird Survey Dataset 1966 - 2014, version 2014.0. U.S. Geological Survey,



- Patuxent Wildlife Research Center <https://www.pwrc.usgs.gov/BBS/RawData/> (2015).
- 35 Moore, J. J. & Howson, C. M. Survey of the rocky shores in the region of Sullom Voe, Shetland, July 2013, A report to SOTEAG from Aquatic Survey & Monitoring Ltd. Cosheston, Pembrokeshire <https://www.soteag.org.uk/environmental-monitoring/monitoring-reports/> (2014).
- 36 International Council for the Exploration of the Sea. ICES DATRAS: Scottish West Coast Survey For Commercial Fish Species 1985-2013. <https://datras.ices.dk> (2013).
- 37 International Council for the Exploration of the Sea. ICES DATRAS: Baltic International Trawl Survey. [https://datras.ices.dk/Data\\_products/Download/Download\\_Data\\_public.aspx](https://datras.ices.dk/Data_products/Download/Download_Data_public.aspx) (2013).
- 38 Degraer, S. et al. Macrobel: Long term trends in the macrobenthos of the Belgian Continental Shelf. GBIF.org <https://www.gbif.org/en/dataset/83c25cb6-f762-11e1-a439-00145eb45e9a> (2006).
- 39 International Council for the Exploration of the Sea. ICES DATRAS: Northern Irish Ground Fish Survey [https://datras.ices.dk/Data\\_products/Download/Download\\_Data\\_public.aspx](https://datras.ices.dk/Data_products/Download/Download_Data_public.aspx) (2010).
- 40 International Council for the Exploration of the Sea. ICES DATRAS: French Southern Atlantic Bottom Trawl Survey. [https://datras.ices.dk/Data\\_products/Download/Download\\_Data\\_public.aspx](https://datras.ices.dk/Data_products/Download/Download_Data_public.aspx) (2010).
- 41 International Council for the Exploration of the Sea. ICES DATRAS: Beam Trawl Survey. [https://datras.ices.dk/Data\\_products/Download/Download\\_Data\\_public.aspx](https://datras.ices.dk/Data_products/Download/Download_Data_public.aspx) (2010).
- 42 International Council for the Exploration of the Sea. ICES DATRAS: North Sea International Bottom Trawl Survey [https://datras.ices.dk/Data\\_products/Download/Download\\_Data\\_public.aspx](https://datras.ices.dk/Data_products/Download/Download_Data_public.aspx) (2010).
- 43 NOAA National Marine Fisheries Service (NMFS) & Northeast Fisheries Science Center. Northeast Fisheries Science Center Bottom Trawl Survey Data. OBIS-USA <https://doi.org/10.15468/8c5pvg> (2005).
- 44 Andrews Forest LTER Site & Franklin, J. F. Long-term growth, mortality and regeneration of trees in permanent vegetation plots in the Pacific Northwest, 1910 to present. Environmental Data Initiative <https://doi.org/10.6073/pasta/2315afa15ad0a2317b49565da6258c47> (2012).
- 45 HMANA. Hawk Migration Association of North America (HMANA) <https://www.hmana.org/> (2016).
- 46 Hutto, R. L. Northern Region Landbird Monitoring Program: a program designed to monitor more than long-term population trends. USDA Forest Service General Technical Report PSW-GTR-191 <https://www.fs.usda.gov/treesearch/pubs/32091> (2005).
- 47 Birds Canada. Marsh Monitoring Program-Bird surveys. NatureCounts, a node of the Avian Knowledge Network, Birds Canada <https://www.naturecounts.ca/> (2012).
- 48 McLarney, W. O., Meador, J. & Chamblee, J. F. Upper Little Tennessee River Biomonitoring Program Database. Coweeta Long Term Ecological Research Program <https://biotime.st-andrews.ac.uk/getDatasetsQ.php?study=229> (2010).
- 49 Australian Antarctic Data Centre. Pelagic Fish Observations 1968-1999. Occurrence dataset. GBIF.org <https://doi.org/10.15468/qqu2dp> (2016).
- 50 Lathrop, R. Madison Wisconsin Lakes Zooplankton 1976 - 1994. Environmental Data Initiative <https://doi.org/10.6073/pasta/ec3d0186753985147d4f283252388e05> (2000).
- 51 Birds Canada. British Columbia Coastal Waterbird Survey. NatureCounts, a node of the Avian Knowledge Network, Birds Canada <https://www.naturecounts.ca/> (2004).

- 52 Rudstam, L. G. Zooplankton survey of Oneida Lake New York 1964 to 2012. KNB  
Data Repository <https://knb.ecoinformatics.org/view/kgordon.17.56> (2016).
- 53 Reichert, M. MARMAP Blackfish Trap Survey 1990-2009. OBIS  
<https://obis.org/dataset/0d4d1d93-df06-4a12-8d03-bd1083864563> (2009).
- 54 NTL Long-Term Ecological Research Network. North Temperate Lakes LTER:  
Zooplankton - Trout Lake Area 1982 - current. Environmental Data Initiative  
<https://lter.limnology.wisc.edu/node/55119> (2010).
- 55 Santa Barbara Coastal LTER & Reed, D. C. SBC LTER: Reef: Kelp forest  
community dynamics: Abundance and size of giant kelp (*Macrocystis pyrifera*),  
ongoing since 2000, ver 18. Environmental Data Initiative  
<https://doi.org/10.6073/pasta/d90872297e30026b263a119d4f5bca9f> (2014).
- 56 Santa Barbara Coastal LTER & Reed, D. C. SBC LTER: Reef: Kelp Forest  
Community Dynamics: Fish abundance, ver 28. Environmental Data Initiative  
<https://doi.org/10.6073/pasta/e37ed29111b2fddffc08355252b8b8c7> (2014).
- 57 Santa Barbara Coastal LTER & Reed, D. C. SBC LTER: Reef: Kelp forest  
community dynamics: Invertebrate and algal density, ver 21. Environmental Data  
Initiative <https://doi.org/10.6073/pasta/cd4cf864efecd69891dfe1d73b9ac9c3> (2014).
- 58 Santa Barbara Coastal LTER & Reed, D. C. SBC LTER: Reef: Kelp forest  
community dynamics: Cover of sessile organisms, Uniform Point Contact, ver 23.  
Environmental Data Initiative  
<https://doi.org/10.6073/pasta/f906c91e98c2a5fe752dfa0ccdc8895f> (2014).
- 59 CMAR. CSIRO Marine Data Warehouse. OBIS Australia  
<https://doi.org/10.15468/asbeok> (2012).
- 60 Moorea Coral Reef LTER & Carpenter, R. Coral Reef: Long-term Population and  
Community Dynamics: Other Benthic Invertebrates, ongoing since 2005 ver 29.  
Environmental Data Initiative  
<https://doi.org/10.6073/pasta/61cc126fc5a5a0a99b62b3aaac56f3e8> (2015).
- 61 Landis, D. & Gage, S. Insect Populations via Sticky Traps at KBS-LTER.  
Environmental Data Initiative  
<https://doi.org/10.6073/pasta/6b6cc0ad7897d9008e8cf918bbf552d2> (2014).
- 62 Privett, S. D. J., Cowling, R. M. & Taylor, H. C. Thirty years of change in the fynbos  
vegetation of the Cape of Good Hope Nature Reserve, South Africa. *Bothalia* **31**, 99-  
115 (2001).
- 63 Taylor, H. A vegetation survey of the Cape of Good Hope Nature Reserve. I. The use  
of association-analysis and Braun-Blanquet methods. *Bothalia* **15**, 245-258 (1984).
- 64 Thuiller, W., Slingsby, J. A., Privett, S. D. J. & Cowling, R. M. Stochastic species  
turnover and stable coexistence in a species-rich, fire-prone plant community. *PLoS  
One* **2**, e938 (2007).
- 65 Pollard, E., Hall, M. L. & Bibby, T. J. *Monitoring the abundance of butterflies 1976-  
1985*. (Nature Conservancy Council, Peterborough, 1986).
- 66 Bestelmeyer, B., Lightfoot, D. & Schooley, R. L. Rodent data from trapping webs in  
the long-term Small Mammal Exclusion Study (SMES) at Jornada Basin LTER,  
1995-2007. Environmental Data Initiative  
<https://doi.org/10.6073/pasta/0c38baecb2e10b4fe70d187ba6f08dda> (2016).
- 67 Halpern, C. B., McKenzie, D., Evans, S. A. & Maguire, D. A. Initial responses of  
forest understories to varying levels and patterns of green-tree retention. *Ecol. Appl.*  
**15**, 175-195 (2005).
- 68 Halpern, C. B. & McKenzie, D. Disturbance and post-harvest ground conditions in a  
structural retention experiment. *Forest. Ecol. Manag.* **154**, 215-225 (2001).

- 69 Halpern, C. B., Halaj, J., Evans, S. A. & Dovciak, M. Level and pattern of overstory retention interact to shape long-term responses of understories to timber harvest. *Ecol. Appl.* **22**, 2049-2064 (2012).
- 70 Halpern, C. DEMO: Vegetation Data—Post-Harvest. Demonstration of Ecosystem Management Options. Forest Science Data Bank, Corvallis <http://andlter.forestry.oregonstate.edu/data/abstract.aspx?dbcode=TP104> (2015).
- 71 Davies, C. H. et al. A database of marine phytoplankton abundance, biomass and species composition in Australian waters. *Sci Data* **3**, 160043 (2016).
- 72 Bradford, M. G., Murphy, H. T., Ford, A. J., Hogan, D. L. & Metcalfe, D. J. Long - term stem inventory data from tropical rain forest plots in Australia. *Ecology* **95**, 2362 (2014).
- 73 Monitoring Site 1000 Project & Biodiversity Center and Ministry of Environment of Japan. Monitoring site 1000 Shorebird Survey. <http://www.biodic.go.jp/moni1000/findings/data/index.html> (2013).
- 74 Monitoring Site 1000 Project & Biodiversity Center and Ministry of Environment of Japan. Monitoring site 1000 Forest and grassland research - Surface wandering beetles survey data. <http://www.biodic.go.jp/moni1000/findings/data/index.html> (2014).
- 75 Sweatman, H. P. A. et al. *Long-Term Monitoring of the Great Barrier Reef. Status Report Number 5. LTM No.5.* (Australian Institute of Marine Science, 2001).
- 76 Olsen, E. M., Carlson, S. M., Gjosaeter, J. & Stenseth, N. C. Nine decades of decreasing phenotypic variability in Atlantic cod. *Ecol. Lett.* **12**, 622-631 (2009).
- 77 Rogers, L. A. et al. Climate and population density drive changes in cod body size throughout a century on the Norwegian coast. *Proc. Natl. Acad. Sci. U.S.A.* **108**, 1961-1966 (2011).
- 78 Stenseth, N. C. et al. Dynamics of coastal cod populations: intra- and intercohort density dependence and stochastic processes. *P Roy Soc B-Biol Sci* **266**, 1645-1654 (1999).
- 79 Barcelo, C., Ciannelli, L., Olsen, E. M., Johannessen, T. & Knutsen, H. Eight decades of sampling reveal a contemporary novel fish assemblage in coastal nursery habitats. *Glob. Change Biol.* **22**, 1155-1167 (2016).
- 80 Stoffels, R. New Zealand Freshwater Fish Database (extended). The National Institute of Water and Atmospheric Research (NIWA), <https://doi.org/10.15468/jbpw92> (2022).
- 81 Neat, F. & Campbell, N. Demersal fish diversity of the isolated Rockall plateau compared with the adjacent west coast shelf of Scotland. *Biol. J. Linn. Soc.* **104**, 138-147 (2011).
- 82 Pombo, L. & Rebelo, J. E. Spatial and temporal organization of a coastal lagoon fish community - Ria de Aveiro, Portugal. *Cybium* **26**, 185-196 (2002).
- 83 Pombo, L., Elliott, M. & Rebelo, J. E. Environmental influences on fish assemblage distribution of an estuarine coastal lagoon, Ria de Aveiro (Portugal). *Sci Mar* **69**, 143-159 (2005).
- 84 Pombo, L., Rebelo, J. E. & Elliott, M. The structure, diversity and somatic production of the fish community in an estuarine coastal lagoon, Ria de Aveiro (Portugal). *Hydrobiologia* **587**, 253-268 (2007).
- 85 Rebelo, J. E. The Ichthyofauna and Abiotic Hydrological Environment of the Ria-De-Aveiro, Portugal. *Estuaries* **15**, 403-413 (1992).
- 86 Kenner, M. C. et al. A multi-decade time series of kelp forest community structure at San Nicolas Island, California. *Ecology* **94**, 2654 (2013).

- 87 Kushner, D. J., Rassweiler, A., McLaughlin, J. P. & Lafferty, K. D. A multi-decade time series of kelp forest community structure at the California Channel Islands. *Ecology* **94**, 2655 (2013).
- 88 Institute of Agricultural & Fisheries research (ILVO). Macrobenthos monitoring at long-term monitoring stations in the Belgian part of the North Sea between 1979 and 1999. <https://doi.org/10.14284/201> (2016).
- 89 Bio-environmental research group, Institute of Agricultural & Fisheries research (ILVO). Macrobenthos monitoring at long-term monitoring stations in the Belgian part of the North Sea from 2001 on. <https://doi.org/10.14284/202> (2016).
- 90 Edelist, D., Rilov, G., Golani, D., Carlton, J. T. & Spanier, E. Restructuring the Sea: profound shifts in the world's most invaded marine ecosystem. *Divers. Distrib.* **19**, 69-77 (2013).
- 91 van Rijn, I. Trawl fisheries in the Israeli Mediterranean 1980-2013. BioTIME <http://biotime.st-andrews.ac.uk> (2016).
- 92 Hundt, R. *Ökologisch-geobotanische Untersuchungen an den mitteldeutschen Wiesengesellschaften unter besonderer Berücksichtigung ihres Wasserhaushaltes und ihrer Veränderung durch die Intensivbewirtschaftung im Rahmen der Großflächenproduktion*. Vol. 3 366 (Biosphärenreservat Rhön, Thüringen, 2001).
- 93 Jandt, U. & Bruelheide, H. German vegetation reference database (GVRD). *Biodiversity & Ecology* **4**, 355 (2012).
- 94 Rocha, R. et al. Consequences of a large-scale fragmentation experiment for Neotropical bats: disentangling the relative importance of local and landscape-scale effects. *Landscape Ecol.* **32**, 31-45 (2017).
- 95 Rocha, R. et al. Secondary forest regeneration benefits old-growth specialist bats in a fragmented tropical landscape. *Sci. Rep.* **8**, 3819 (2018).
- 96 Sampaio, E. M., Kalko, E. K. V., Bernard, E., Rodriguez-Herrera, B. & Handley, C. O. A biodiversity assessment of bats (Chiroptera) in a tropical lowland rainforest of Central Amazonia, including methodological and conservation considerations. *Stud. Neotrop. Fauna Environ.* **38**, 17-31 (2003).
- 97 Rocha, J. R. T. *Tropical forest fragmentation: effects on the spatio-temporal dynamics of its bat communities*. (Universidade de Lisboa, Lisbon, Portugal, 2017).
- 98 Sarker, S. K. et al. 1980s-2010s: The world's largest mangrove ecosystem is becoming homogeneous. *Biol. Conserv.* **236**, 79-91 (2019).
- 99 Gjerdrum, C. & Fifield, D. CWS-EC Eastern Canada Seabirds at Sea (ECSAS). OBIS Canada Digital Collections <https://obis.org/dataset/51391fb1-ae4d-44d8-9178-a06f95545604> (2019).
- 100 Animal Demography Unit. Coordinated Waterbird Counts (CWAC). AfrOBIS <https://obis.org/dataset/a60f84ee-0e25-428e-b171-16686b554702> (2012).
- 101 Zettler, M. L. Macrobenthos baltic sea (1980-2005) as part of the IOW-Monitoring. Institut für Ostseeforschung Warnemünde, Germany [https://ipt.vliz.be/eurobis/resource?r=macroben\\_zettler\\_evco](https://ipt.vliz.be/eurobis/resource?r=macroben_zettler_evco) (2005).
- 102 Milchakova, N. A., Ryabogina, V. G. & Chernyshova, E. B. Macroalgae of the Crimean coastal zone (the Black Sea, 1967-2007). Sevastopol, IBSS <https://obis.org/dataset/9c30c528-b4aa-4b3c-b7c2-ff0566ff12ee> (2011).
- 103 Addinck, W. & de Kluijver, M. North Sea observations of Crustacea, Polychaeta, Echinodermata, Mollusca and some other groups between 1986 and 2003. Expert Centre for Taxonomic Identification (ETI), the Netherlands [https://ipt.vliz.be/eurobis/resource?r=zma\\_noordzee](https://ipt.vliz.be/eurobis/resource?r=zma_noordzee) (2003).
- 104 Derezuyk, N. Phytoplankton of the Ukrainian Black Sea shelf (1985-2005). EurOBIS. [https://ipt.vliz.be/eurobis/resource?r=derezuk\\_phytoplankton](https://ipt.vliz.be/eurobis/resource?r=derezuk_phytoplankton) (accessed 2012).

- 105 Santos, M., Cotano, U. & Sagarminaga, Y. Zooplankton in the Bay of Biscay (1995-2004 Yearly Spring DEPM surveys). AZTI-Tecnalia. Occurrence dataset. GBIF.org <https://doi.org/10.15468/1uh1hb> (2020).
- 106 Naumov, A. Benthos of the White Sea. A database. White Sea Biological Station. Zoological Institute RAS [http://ipt.vliz.be/eurobis/resource?r=white\\_sea\\_benthos](http://ipt.vliz.be/eurobis/resource?r=white_sea_benthos) (2012).
- 107 Markhaseva, E. L., Golikov, A. A., Agapova, T. A. & Beig, A. A. Archives of the Arctic Seas Zooplankton 1. OBIS <https://obis.org/dataset/17ce69d0-2504-4ae3-bc87-16b096863f51> (1985).
- 108 CMAR. CSIRO Marine Data Warehouse. OBIS Australia. <https://doi.org/10.15468/asbeok> (accessed 2012).
- 109 Agència Catalana de l'Aigua. Desenvolupament d'un índex d'integritat biòtica (IBICAT) basat en l'ús dels peixos com a indicadors de la qualitat ambiental dels rius a Catalunya (Aplicació de la Directiva Marc en Política d'Aigües de la Unió Europea (2000/60/CE), 2003).
- 110 Agència Catalana de l'Aigua. Ajust de l'Índex d'Integritat Biòtica (IBICAT) basat en l'ús dels peixos com a indicadors de la qualitat ambiental als rius de Catalunya (Departament de Medi Ambient i Habitatge, Generalitat de Catalunya, 2010).
- 111 Agència Catalana de l'Aigua. ACORD GOV/139/2013, de 15 d'octubre, pel qual s'aprova el Programa de seguiment i control del Districte de conca fluvial de Catalunya per al període 2013-2018 (2018).
- 112 Gido, K. B., Propst, D. L., Olden, J. D. & Bestgen, K. R. Multidecadal responses of native and introduced fishes to natural and altered flow regimes in the American Southwest. *Can. J. Fish. Aquat. Sci.* **70**, 554-564 (2013).
- 113 Gido, K. B. et al. Pockets of resistance: Response of arid-land fish communities to climate, hydrology, and wildfire. *Freshwater Biology* **64**, 761-777 (2019).
- 114 Kesner, B. R. & Marsh, P. C. Central Arizona project fish monitoring: Final report. Analysis of fish population monitoring data for selected waters of the Gila River Basin, Arizona, for the five year period 2005-2009. Contract No. R09PD32013. (U.S. Bureau of Reclamation. Tempe, Arizona: Marsh and Associates, LLC., 2010).
- 115 Terui, A. et al. Metapopulation stability in branching river networks. *Proc. Natl. Acad. Sci. U.S.A.* **115**, E5963-E5969 (2018).
- 116 Iowa DNR [Department of Natural Resources]. BioNet - Iowa DNR Biological Monitoring and Assessment Database. <https://programs.iowadnr.gov/bionet/> (2013).
- 117 Milardi, M. et al. The role of species introduction in modifying the functional diversity of native communities. *Sci. Total Environ.* **699** (2020).
- 118 Leveque, C., Hougard, J. M., Resh, V., Statzner, B. & Yameogo, L. Freshwater ecology and biodiversity in the tropics: what did we learn from 30 years of onchocerciasis control and the associated biomonitoring of West African rivers? *Hydrobiologia* **500**, 23-49 (2003).
- 119 Pyron, M., Vaughn, C. C., Winston, M. R. & Pigg, J. Fish assemblage structure from 20 years of collections in the Kiamichi River, Oklahoma. *Southwest. Nat.* **43**, 336-343 (1998).
- 120 Casatti, L., Ferreira, C. D. & Carvalho, F. R. Grass-dominated stream sites exhibit low fish species diversity and dominance by guppies: an assessment of two tropical pasture river basins. *Hydrobiologia* **632**, 273-283 (2009).
- 121 Zeni, J. O., Hoeninghaus, D. J. & Casatti, L. Effects of pasture conversion to sugarcane for biofuel production on stream fish assemblages in tropical agroecosystems. *Freshwater Biology* **62**, 2026-2038 (2017).

- 122 McLarney, W. O., Meador, J. & Chamblee, J. Upper Little Tennessee River  
biomonitoring program database. Coweeta Long Term Ecological Research Program  
[https://coweeta.uga.edu/dbpublic/dataset\\_details.asp?accession54045](https://coweeta.uga.edu/dbpublic/dataset_details.asp?accession54045) (2013).
- 123 Long Term Resource Monitoring Program.  
[https://www.umesc.usgs.gov/data\\_library/fisheries/fish1\\_query.shtml](https://www.umesc.usgs.gov/data_library/fisheries/fish1_query.shtml) (2016).
- 124 Murray-Darling Basin Authority. Murray-Darling Basin Fish and Macroinvertebrate  
Survey. <https://data.gov.au/data/dataset/7826d7c9-bcc5-48c0-832a-66aaedfe7b0f>  
(2018).
- 125 Minnesota Pollution Control Agency. Surface water data.  
[https://cf.pca.state.mn.us/water/watershedweb/wdip/search\\_more.cfm?datatype=assessments](https://cf.pca.state.mn.us/water/watershedweb/wdip/search_more.cfm?datatype=assessments)  
(2018).
- 126 Montana, Fish, Wildlife & Parks, Fish Survey Sites. [http://gis-  
mtftp.opendata.arcgis.com/datasets/8192e75218c6460ba97ba3dd0a2fb3a5](http://gis-mtftp.opendata.arcgis.com/datasets/8192e75218c6460ba97ba3dd0a2fb3a5) (2019).
- 127 U.S. Geological Survey. BioData - Aquatic Bioassessment Data for the Nation.  
<https://aquatic.biodata.usgs.gov/clearCriteria.action> (2019).
- 128 U.K. Environmental Agency. National Fish Populations Database (NFPD):  
Freshwater fish survey relational datasets. [https://data.gov.uk/dataset/d129b21c-9e59-  
4913-91d2-82faef1862dd/nfpd-freshwater-fish-survey-relational-datasets](https://data.gov.uk/dataset/d129b21c-9e59-4913-91d2-82faef1862dd/nfpd-freshwater-fish-survey-relational-datasets) (2019).
- 129 North Carolina Department of Environmental Quality. Fish Community Assessment  
Data. [https://deq.nc.gov/about/divisions/water-resources/water-resources-data/water-  
sciences-home-page/biological-assessment-branch/fish-community](https://deq.nc.gov/about/divisions/water-resources/water-resources-data/water-sciences-home-page/biological-assessment-branch/fish-community) (2018).
- 130 Fagundes, D. C. et al. The stream fish fauna from three regions of the Upper Parana  
River basin. *Biota Neotrop* **15**, e20140187 (2015).
- 131 Winston, M. R., Taylor, C. M. & Pigg, J. Upstream extirpation of four minnow  
species due to damming of a prairie stream. *Trans. Am. Fish. Soc.* **120**, 98-105 (1991).
- 132 Taylor, C. M. in *Community ecology of stream fishes: concepts, approaches, and  
techniques* Ch. Covariation among plains stream fish assemblages, flow regimes, and  
patterns of water use, (American Fisheries Society Symposium, 2010).
- 133 Office français de la biodiversité. Suivi des éléments biologiques ‘POISSONS’ des  
rivières françaises. <http://www.naiades.eaufrance.fr/acces-donnees#/hydrobiologie>  
(2019).
- 134 Agencia Vasca del Agua. UBEGI. Información sobre el estado de las masas de agua  
de la CAPV. <http://www.uragentzia.euskadi.eus/informacion/ubegi/u81-0003341/es/>  
(2019).
- 135 Davenport, S. R. Unpublished data.
- 136 Dala-Corte, R. B., Becker, F. G. & Melo, A. S. The importance of metacommunity  
processes for long-term turnover of riffle-dwelling fish assemblages depends on  
spatial position within a dendritic network. *Can. J. Fish. Aquat. Sci.* **74**, 101-115  
(2017).
- 137 Toronto and Region Conservation Authority (TRCA). Watershed Fish Community.  
<https://data.trca.ca/dataset/2018-watershed-fish-community> (2018).
- 138 Eros, T. et al. Quantifying temporal variability in the metacommunity structure of  
stream fishes: the influence of non-native species and environmental drivers.  
*Hydrobiologia* **722**, 31-43 (2014).
- 139 Stefferud, J. A. Unpublished data.
- 140 Sers, B. Swedish Electrofishing RegiSter – SERS. Swedish University of Agricultural  
Sciences (SLU), Department of Aquatic Resources <http://www.slu.se/elfiskeregistret>  
(2013).

- 141 Benejam, L., Angermeier, P. L., Munne, A. & Garcia-Berthou, E. Assessing effects of  
water abstraction on fish assemblages in Mediterranean streams. *Freshwater Biology*  
**55**, 628-642 (2010).
- 142 Merciai, R., Molons-Sierra, C., Sabater, S. & Garcia-Berthou, E. Water abstraction  
affects abundance, size-structure and growth of two threatened cyprinid fishes. *PLoS*  
*One* **12**, e0175932 (2017).
- 143 Rinne, J. N. & Miller, D. Hydrology, geomorphology and management: Implications  
for sustainability of native southwestern fishes. *Rev. Fish. Sci.* **14**, 91-110 (2006).
- 144 Van Thuyne et al. VIS - Fishes in inland waters in Flanders, Belgium. Research  
Institute for Nature and Forest (INBO) <https://www.gbif.org/dataset/823dc56e-f987-495c-98bf-43318719e30f> (2013).
- 145 Brosens, D. et al. VIS - A database on the distribution of fishes in inland and estuarine  
waters in Flanders, Belgium. *Zookeys* **475**, 119-145 (2015).
- 146 Gammon, J. The fish communities of Big Raccoon Creek 1981-2002. Report for  
Heritage Environmental Services (Indianapolis, Indiana, 2013).
- 147 Bunn, S. E. et al. Integration of science and monitoring of river ecosystem health to  
guide investments in catchment protection and rehabilitation. *Freshwater Biology* **55**,  
223-240 (2010).
- 148 Finnish electrofishing register Hertta.  
[https://www.ymparisto.fi/koekalastus\\_sahko/yhteinen/Login.aspx?ReturnUrl=%2fkoekalastus\\_sahko](https://www.ymparisto.fi/koekalastus_sahko/yhteinen/Login.aspx?ReturnUrl=%2fkoekalastus_sahko) (2019).
- 149 Whitney, J. E., Gido, K. B., Martin, E. C. & Hase, K. J. The first to arrive and the last  
to leave: colonisation and extinction dynamics of common and rare fishes in  
intermittent prairie streams. *Freshwater Biology* **61**, 1321-1334 (2016).
- 150 Rennie, S. et al. UK Environmental Change Network (ECN) moth data: 1992-2015.  
NERC Environmental Information Data Centre <https://doi.org/10.5285/a2a49f47-49b3-46da-a434-bb22e524c5d2> (2017).
- 151 R. Van Klink et al. A global database of long-term changes in insect assemblages.  
Knowledge Network for Biocomplexity <https://doi.org/10.5063/F1ZC817H> (2020).
- 152 Rennie, S. et al. UK Environmental Change Network (ECN) butterfly data: 1993-  
2015. NERC Environmental Information Data Centre  
<https://doi.org/10.5285/5aeda581-b4f2-4e51-b1a6-890b6b3403a3> (2017).
- 153 Rennie, S. et al. UK Environmental Change Network (ECN) carabid beetle data:  
1992-2012. NERC Environ. Inform. Data Centre <https://doi.org/10.5285/8385f864-dd41-410f-b248-028f923cb281> (2017).
- 154 Valtonen, A. et al. Long - term species loss and homogenization of moth  
communities in Central Europe. *J. Anim. Ecol.* **86**, 730-738 (2017).
- 155 Pizzolotto, R., Gobbi, M. & Brandmayr, P. Changes in ground beetle assemblages  
above and below the treeline of the Dolomites after almost 30 years (1980/2009).  
*Ecol. Evol.* **4**, 1284-1294 (2014).
- 156 Huttunen, K.-L. et al. Habitat connectivity and in-stream vegetation control temporal  
variability of benthic invertebrate communities. *Sci. Rep.* **7**, 1448 (2017).
- 157 Groker, G. National river water quality network database (macro-invertebrates). GBIF  
<https://doi.org/10.15468/mfjetu> (2018).
- 158 Schuch, S., Bock, J., Krause, B., Wesche, K. & Schaefer, M. Long-term population  
trends in three grassland insect groups: a comparative analysis of 1951 and 2009. *J.*  
*Appl. Entomol.* **135**, 321-331 (2012).
- 159 Schuch, S., Wesche, K. & Schaefer, M. Long-term decline in the abundance of  
leafhoppers and planthoppers (Auchenorrhyncha) in Central European protected dry  
grasslands. *Biol. Conserv.* **149**, 75-83 (2012).

- 160 SLU. Miljödata MVM. version 2.15.00 <https://miljodata.slu.se/mvm/Default.aspx> (2021).
- 161 Iowa Mosquito Surveillance. Iowa Mosquito Surveillance. <https://mosquito.ent.iastate.edu/> (2019).
- 162 Marion County Health Department. Data Set: Mosquito surveillance in Marion County, Indiana, USA. VectorBase [https://vectorbase.org/vectorbase/app/record/dataset/DS\\_9c7db23897](https://vectorbase.org/vectorbase/app/record/dataset/DS_9c7db23897) (2020).
- 163 Lee County Mosquito Control District. Data Set: Lee County Mosquito Control Department data in Lee county, Florida, 2018 VectorBase [https://vectorbase.org/vectorbase/app/record/dataset/DS\\_8c513b1b6b](https://vectorbase.org/vectorbase/app/record/dataset/DS_8c513b1b6b) (2020).
- 164 Manatee County Mosquito Control District. Data Set: Mosquito surveillance in Manatee County, Florida, USA. 2020 VectorBase [https://vectorbase.org/vectorbase/app/record/dataset/DS\\_736e6c50fe](https://vectorbase.org/vectorbase/app/record/dataset/DS_736e6c50fe) (2021).
- 165 Pereira, F. W., Carneiro, L. & Goncalves, R. B. More losses than gains in ground-nesting bees over 60 years of urbanization. *Urban Ecosyst* **24**, 233-242 (2021).
- 166 Environment Agency. Ecology & Fish Bulk Downloads. UK Dep. Environ. Food Rural Aff. <https://environment.data.gov.uk/ecology/explorer/downloads/> (2021).
- 167 Choi, S.-W. Long-term (2005–2017) macromoth community monitoring at Mt. Jirisan National Park, South Korea. <https://db.cger.nies.go.jp/JaLTER/metacat/metacat?action=read&qformat=jalter-en&sessionid=&docid=ERDP-2019-02.1> (2019).
- 168 Choi, S. W., An, J. S., Kim, N. H., Lee, S. & Ahn, N. Long-term (2005-2017) macromoth community monitoring at Mt. Jirisan National Park, South Korea. *Ecol. Res.* **34**, 443-443 (2019).
- 169 Desplaines Valley Mosquito Abatement District. Data Set: Mosquito surveillance in Desplaines Valley Mosquito Abatement, Illinois, USA, 2020. VectorBase [https://vectorbase.org/vectorbase/app/record/dataset/DS\\_ed76974f48](https://vectorbase.org/vectorbase/app/record/dataset/DS_ed76974f48) (2020).
- 170 City of Suffolk Mosquito Control. Data Set: Mosquito surveillance in City of Suffolk, Virginia, USA. 23434, 2015. VectorBase [https://vectorbase.org/vectorbase/app/record/dataset/DS\\_a77ea39069](https://vectorbase.org/vectorbase/app/record/dataset/DS_a77ea39069) (2019).
- 171 Ada County Weed, Pest, and Mosquito Abatement. Data Set: Mosquito surveillance, Ada County Weed, Pest, and Mosquito, in Idaho, USA, 2018. VectorBase [https://vectorbase.org/vectorbase/app/record/dataset/DS\\_da9aa55156](https://vectorbase.org/vectorbase/app/record/dataset/DS_da9aa55156) (2020).
- 172 Prendergast, J. et al. The Global Population Dynamics Database. Knowledge Network for Biocomplexity <https://doi.org/10.5063/f1bz63z8> (2010).
- 173 Alston, J. M. et al. Ecological consequences of large herbivore exclusion in an African savanna: 12 years of data from the UHURU experiment. *Ecology* **103**, e3649 (2022).
- 174 Alston, J. M. et al. Ecological consequences of large herbivore exclusion in an African savanna: 12 years of data from the UHURU experiment. Dryad Dataset <https://doi.org/10.5061/dryad.1g1jwstxw> (2022).
- 175 Muthukrishnan, R. & Larkin, D. Invasive species and biotic homogenization in temperate aquatic plant communities. Dryad Dataset <https://doi.org/10.5061/dryad.15dv41nt2> (2020).
- 176 Muthukrishnan, R. & Larkin, D. J. Invasive species and biotic homogenization in temperate aquatic plant communities. *Glob. Ecol. Biogeogr.* **29**, 656-667 (2020).
- 177 Myers-Smith, I. H. et al. Eighteen years of ecological monitoring reveals multiple lines of evidence for tundra vegetation change. *Ecol. Monogr.* **89**, e01351 (2019).
- 178 Myers-Smith, I. H. ShrubHub/QikiqtarukHub: QikiqtarukHub\_v1.0. Zenodo <https://doi.org/10.5281/zenodo.2397996> (2018).



- 179 Price, E. P. F., Spyreas, G. & Matthews, J. Biotic homogenization of regional wetland plant communities within short timescales in the presence of an aggressive invader. University of Illinois at Urbana-Champaign [https://doi.org/10.13012/B2IDB-0478588\\_V2](https://doi.org/10.13012/B2IDB-0478588_V2) (2017).
- 180 Santa Barbara Coastal LTER, Reed, D. & Miller., R. SBC LTER: Reef: Annual time series of biomass for kelp forest species, ongoing since 2000 ver 11. Environmental Data Initiative <https://doi.org/10.6073/pasta/1a4de6e46a64186661b0407f786a14bd> (2022).
- 181 Jeremy, R.-S. & Jacklyn, P. Three Parks Savanna Fire-effects Plot Network: Plot-based Vegetation Sampling Data, Northern Territory, Australia, 1994-2016. The Australian National University Data Commons <https://doi.org/10.25911/5c3d75bbca1c0> (2017).
- 182 Santana, J. et al. Using beta diversity to inform agricultural policies and conservation actions on Mediterranean farmland. *J. Appl. Ecol.* **54**, 1825-1835 (2017).
- 183 Sonnier, G., Whittington, R. & H., B. E. Long-term response of wetland plant communities to management intensity, grazing abandonment, and prescribed fire ver 1. Environmental Data Initiative <https://doi.org/10.6073/pasta/f20622c01b40e1e08e72f01e29f59302> (2022).
- 184 Sorte, C. J. B. et al. Long-term declines in an intertidal foundation species parallel shifts in community composition. *Glob. Change Biol.* **23**, 341-352 (2017).
- 185 Sperandii, M. G. & Acosta, A. T. R. Back into the past: Resurveying random plots to track community changes in Italian coastal dunes. Dryad Dataset <https://doi.org/10.5061/dryad.np5hqbzr8> (2020).
- 186 Szydlowski, D. K., Elgin, A. K., Lodge, D. M., Tiemann, J. S. & Larson., E. R. Aquatic snail and macrophyte abundance and richness data for ten lakes in Vilas County, WI, USA, 1987-2020 ver 1. Environmental Data Initiative <https://doi.org/10.6073/pasta/29733b5269efe990c3d2d916453fe4dd> (2022).
- 187 Tanner, J. E. & Connell, J. H. Coral community data Heron Island Great Barrier Reef 1962–2016. *Sci Data* **9**, 617 (2022).
- 188 Vojik, M. & Boublik, K. Fear of the dark: decline in plant diversity and invasion of alien species due to increased tree canopy density and eutrophication in lowland woodlands. *Plant Ecol.* **219**, 749-758 (2018).
- 189 Wardle, G., Dickman, C., Greenville, A. & Tamayo, B. Desert Ecology Plot Network: Vegetation Plot-data, Simpson Desert, Western Queensland, 1993-2018. Long Term Ecological Research Network (LTERN), ANU Data Commons, The Australian National University <https://doi.org/10.25911/5c355ce264ffe> (2018).
- 190 Wardle, G., Dickman, C., Greenville, A. & Tamayo, B. Desert Ecology Plot Network: Reptile Abundance Plot-data, Simpson Desert, Western Queensland, 1990-2018. Long Term Ecological Research Network (LTERN), ANU Data Commons, The Australian National University <http://doi.org/10.25911/5c1099272c24b> (2018).
- 191 Willig, M. R. El Verde long-term invertebrate data - Luquillo Forest Dynamics Plot (LFDP) ver 9996737. Environmental Data Initiative <https://doi.org/10.6073/pasta/45e3a90ed462f66acdde83636746f87f> (2020).
- 192 Wright, K. W. et al. Bee species abundance and composition in three ecosystem types at the Sevilleta National Wildlife Refuge, New Mexico, USA ver 2. Environmental Data Initiative <https://doi.org/10.6073/pasta/cbe04a94b5f6f3859a3d9c98f5be0fc8> (2021).
- 193 Alves, C. et al. Twenty years of change in benthic communities across the Belizean Barrier Reef. *PLoS One* **17**, e0249155 (2022).

- 194 Amesbury, S. S., Ginsburg, D., Rongo, T., Kirkendale, L. & Starmer, J. War-in-the-  
pacific national historical park marine biological survey, a Report to the U.S. National  
Park Service. University of Guam Marine Laboratory (1999).
- 195 Gruman, C. et al. Replication data for: Long term monitoring of the rocky intertidal  
on Wizard Island in Barkley Sound. Scholars Portal Dataverse, V1.1  
<https://doi.org/10.5683/SP2/VBPBFN> (2019).
- 196 Beldade, R., Mills, S. C., Claudet, J. & Cote, I. M. More coral, more fish? Contrasting  
snapshots from a remote Pacific atoll. *PeerJ* **3**, e745 (2015).
- 197 Burlakova, L. E. et al. Density data for Lake Ontario benthic invertebrate assemblages  
from 1964 to 2018. *Ecology* **102**, e03528 (2021).
- 198 Cervantes-Yoshida, K., Leidy, R. A. & Carlson, S. M. Contemporary Land Change  
Alters Fish Communities in a San Francisco Bay Watershed, California, USA. *PLoS  
One* **10**, e0141707 (2015).
- 199 Chen, I. C. et al. Asymmetric boundary shifts of tropical montane Lepidoptera over  
four decades of climate warming. *Glob. Ecol. Biogeogr.* **20**, 34-45 (2011).
- 200 Christensen, E. et al. Quadrat-based monitoring of desert grassland vegetation at the  
Jornada Experimental Range, New Mexico, 1915-2016. *Ecology* **102**, e03530 (2021).
- 201 Closset-Kopp, D., Hattab, T. & Decocq, G. Do drivers of forestry vehicles also drive  
herb layer changes (1970-2015) in a temperate forest with contrasting habitat and  
management conditions? *J. Ecol.* **107**, 1439-1456 (2019).
- 202 Dunbar, M., Murphy, J., Clarke, R., Davies, C. & Scarlett, P. Headwater stream  
invertebrate data 2007 [Countryside Survey]. NERC Environmental Information Data  
Centre <https://doi.org/10.5285/18849325-358b-4af1-b20d-d750b1c723a3> (2016).
- 203 Furse, M. T. et al. Headwater stream invertebrate data 1990 [Countryside Survey].  
NERC Environmental Information Data Centre [https://doi.org/10.5285/b4c17f35-  
1b50-4ed7-87d2-b63004a96ca2](https://doi.org/10.5285/b4c17f35-1b50-4ed7-87d2-b63004a96ca2) (2016).
- 204 Furse, M. T. et al. Headwater stream invertebrate data 1998 [Countryside Survey].  
NERC Environmental Information Data Centre [https://doi.org/10.5285/fd0ce233-  
3b4d-4a5e-abcb-c0a26dd71c95](https://doi.org/10.5285/fd0ce233-3b4d-4a5e-abcb-c0a26dd71c95) (2016).
- 205 Dunbar, M., Murphy, J., Clarke, R., Davies, C. & Scarlett, P. Headwater stream  
macrophyte data 2007 [Countryside Survey]. NERC Environmental Information Data  
Centre <https://doi.org/10.5285/249a90ec-238b-4038-a706-6633c3690d20> (2016).
- 206 Furse, M. T. et al. Headwater stream macrophyte data 1998 [Countryside Survey].  
NERC Environmental Information Data Centre [https://doi.org/10.5285/e0b638d5-  
8271-4442-97ef-cf46ea220f5d](https://doi.org/10.5285/e0b638d5-8271-4442-97ef-cf46ea220f5d) (2016).
- 207 Wood, C. M. et al. Long-term vegetation monitoring in Great Britain - the  
Countryside Survey 1978-2007 and beyond. *Earth Syst Sci Data* **9**, 445-459 (2017).
- 208 Santa Barbara Coastal LTER & Dugan, J. SBC LTER: Beach: Time series of  
abundance of birds and stranded kelp on selected beaches, ongoing since 2008 ver 10.  
Environmental Data Initiative  
<https://doi.org/10.6073/pasta/06c6b9983a5f0a44349e027a002f5040> (2021).
- 209 Ellingsen, K. E., Yoccoz, N. G., Tveraa, T., Hewitt, J. E. & Thrush, S. F. Data from:  
Long-term environmental monitoring for assessment of change: measurement  
inconsistencies over time and potential solutions. Dryad  
<https://doi.org/10.5061/dryad.2v7m4> (2018).
- 210 Gaget, E. et al. Disentangling the latitudinal and altitudinal shifts in community  
composition induced by climate change: the case of riparian birds. Dryad Dataset  
<https://doi.org/10.5061/dryad.1rn8pk0rx> (2021).

- 211 Gibb, H., Grossman, B., Dickman, C., Decker, O. & Wardle, G. Data from: Long-term responses of desert ant assemblages to climate. Dryad Dataset <https://doi.org/10.5061/dryad.vc80r13> (2019).
- 212 Green, J. M., Dunbrack, R. L. & Bates, A. E. Signals of resilience and change in tidepool fish communities on the Pacific coast of Vancouver Island, Canada. *Divers. Distrib.* **27**, 2170-2179 (2021).
- 213 Keith, D. et al. Upland Heath Swamps Plot Network: Vegetation Floristics, Royal National Park, Sydney Basin, NSW, Australia, 1990-2014. Long Term Ecological Research Network <https://doi.org/10.25911/5c36e061dc7da> (2018).
- 214 Kolesnikova, A., Konakova, T., Taskaeva, A. & Kudrin, A. Soil invertebrates of coniferous forests along a gradient of air pollution (Komi Republic). *Biodiversity Data Journal* **9** (2021).
- 215 Larkin, D. J. et al. Phylogenetic measures of plant communities show long-term change and impacts of fire management in tallgrass prairie remnants. *J. Appl. Ecol.* **52**, 1638-1648 (2015).
- 216 Lelli, C. et al. Long-term changes in Italian mountain forests detected by resurvey of historical vegetation data. *J Veg Sci* **32**, e12939 (2021).
- 217 Lightfoot, D. & Whitford., W. Lizard pitfall trap data from 11 NPP study locations at the Jornada Basin LTER site, 1989-2006. Environmental Data Initiative <https://doi.org/10.6073/pasta/51814fa39f87aea44629a5be8602ec49> (2022).
- 218 Magalhaes, A. L. B. et al. All the colors of the world: biotic homogenization-differentiation dynamics of freshwater fish communities on demand of the Brazilian aquarium trade. *Hydrobiologia* **847**, 3897-3915 (2020).
- 219 Maleki, K., Marchand, P., Charron, D., Lafleur, B. & Bergeron, Y. A 249 - yr chronosequence of forest plots from eight successive fires in the Eastern Canada boreal mixedwoods. *Ecology* **102**, e03306 (2021).
- 220 Matthews, W. J. & Marsh-Matthews, E. Dynamics of an upland stream fish community over 40 years: trajectories and support for the loose equilibrium concept. *Ecology* **97**, 706-719 (2016).
- 221 Mendieta - Leiva, G., Buckley, H. L. & Zotz, G. Directional changes over time in the species composition of tropical vascular epiphyte assemblages. *J. Ecol.* **110**, 553-568 (2022).
- 222 Moore, M. M. et al. Cover and density of southwestern ponderosa pine understory plants in permanent chart quadrats (2002–2020). *Ecology* **103**, e3661 (2022).
- 223 Mushet, D. M., Euliss, N. H., Jr. & Solensky, M. J. Cottonwood Lake Study Area - Invertebrate Counts. U.S. Geological Survey data release <https://doi.org/10.5066/F7BK1B77> (2017).
